# Supplementary material for: Ni-Catalyzed C(sp2)–H alkylation of N-quinolylbenzamides using alkylsilyl peroxides as structurally diverse alkyl sources
Source: Royal Society of Chemistry journal article supplement (doi:10.1039/d1cc02983e), 2021-01-01

Supporting Information for

**Ni-Catalyzed C(sp<sup>2</sup>)-H alkylation of *N*-Quinolylbenzamide  
using alkylsilyl peroxides as structurally diverse alkyl sources**

Saori Tsuzuki,<sup>a</sup> Shunya Sakurai,<sup>a</sup> Akira Matsumoto,<sup>b</sup> Taichi Kano,<sup>a,c</sup> and Keiji Maruoka<sup>\*,a,b,d</sup>  
E-mail: maruoka.keiji.4w@kyoto-u.ac.jp

<sup>a</sup> *Department of Chemistry, Graduate School of Science, Kyoto University  
Sakyo, Kyoto 606-8502, Japan*

<sup>b</sup> *Graduate School of Pharmaceutical Sciences, Kyoto University  
Sakyo, Kyoto 606-8501, Japan*

<sup>c</sup> *Department of Applied Chemistry, Graduate School of Engineering, Tokyo University of Agriculture and  
Technology  
Koganei, Tokyo, 184-8588, Japan.2-24-16*

<sup>d</sup> *School of Chemical Engineering and Light Industry, Guangdong University of Technology  
Guangzhou 510006, China*

## Table of Contents

|                                                                                                                                                    |            |
|----------------------------------------------------------------------------------------------------------------------------------------------------|------------|
| <b>1. General Information</b>                                                                                                                      | <b>S2</b>  |
| <b>2. General Procedure for the Preparation of <i>N</i>-Quinolybenzamide Substrates</b>                                                            | <b>S3</b>  |
| <b>3. Characterization Data of Unreported Alkylsilyl Peroxides</b>                                                                                 | <b>S5</b>  |
| <b>4. Synthesis of Triethyl((2-phenyldecan-2-yl)peroxy)silane (2g)</b>                                                                             | <b>S8</b>  |
| <b>5. Optimization of Reaction Conditions</b>                                                                                                      | <b>S10</b> |
| <b>6. General Procedures for Ni-catalyzed AQ-directed C(sp<sup>2</sup>)-H Alkylation Reactions with ASPs</b>                                       | <b>S12</b> |
| <b>7. Synthesis of 2-(4-(3,7-Dimethyl-2,6-dioxo-2,3,6,7-tetrahydro-1<i>H</i>-purin-1-yl)butyl)-6-methyl-<i>N</i>-(quinolin-8-yl)benzamide (3s)</b> | <b>S21</b> |
| <b>8. Control Experiments</b>                                                                                                                      | <b>S22</b> |
| <b>9. References</b>                                                                                                                               | <b>S23</b> |
| <b>10. <sup>1</sup>H NMR and <sup>13</sup>C NMR Spectra</b>                                                                                        | <b>S24</b> |

## 1. General Information

<sup>1</sup>H NMR spectra were measured on JEOL JNM-ECA500 (500 MHz) spectrometer. Data were reported as follows: chemical shifts in ppm from tetramethylsilane as an internal standard in CDCl<sub>3</sub>, integration, multiplicity (s = singlet, d = doublet, t = triplet, q = quartet, m = multiplet, dd = doublet-doublet, dt = doublet-triplet, ddd = doublet-doublet-doublet), coupling constants (Hz), and assignment. <sup>13</sup>C NMR spectra were measured on JEOL JNM-ECA500 (125 MHz) spectrometer with complete proton decoupling. Chemical shifts were reported in ppm from the residual solvent as an internal standard. High-resolution mass spectra (HRMS) were performed on Bruker micrOTOF. For thin layer chromatography (TLC) analysis throughout this work, Merck precoated TLC plates (Merck, TLC Silica gel 60 F<sub>254</sub>) were used. The products were purified by flash column chromatography on silica gel (Kanto Chemical, Silica gel 60 N, spherical, neutral, 40-50 μm or FUJIFILM Wako, Wakosil<sup>®</sup>, 60, spherical, 64-210 μm) or preparative thin layer chromatography silica gel (PLC 60 F<sub>254</sub>. 0.5 mm). Commercially available reagents and solvents were purchased from CHEM-IMPEX INT'L INC., FUJIFILM Wako, Oakwood Chemical, Sigma-Aldrich and TCI, and used as received. DMF was used a Super Dehydrated DMF purchased from FUJIFILM Wako. Alkylsilyl peroxides (ASPs) were prepared according to the literature procedures.<sup>[1]</sup> All reactions were performed under N<sub>2</sub> atmosphere, and NMR yields were determined by <sup>1</sup>H NMR spectroscopy using 1,1,2,2-tetrachloroethane as an internal standard.

## 2. General Procedure for the Preparation of *N*-Quinolylylbenzamide Substrates

All aromatic amides bearing an 8-aminoquinoline moiety were prepared by general procedures A or B.<sup>[2,3]</sup> Spectral data of **1a–1k** matched those previously reported in the literatures.<sup>[2–4]</sup>

### General Procedure A

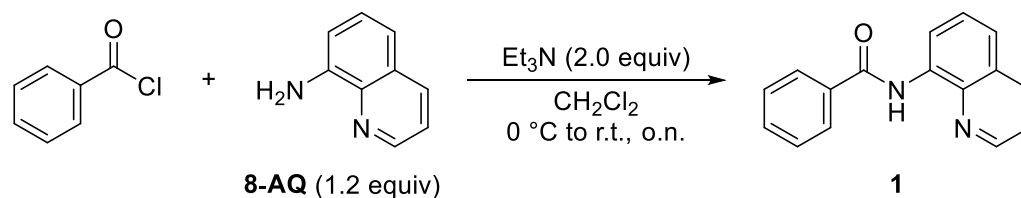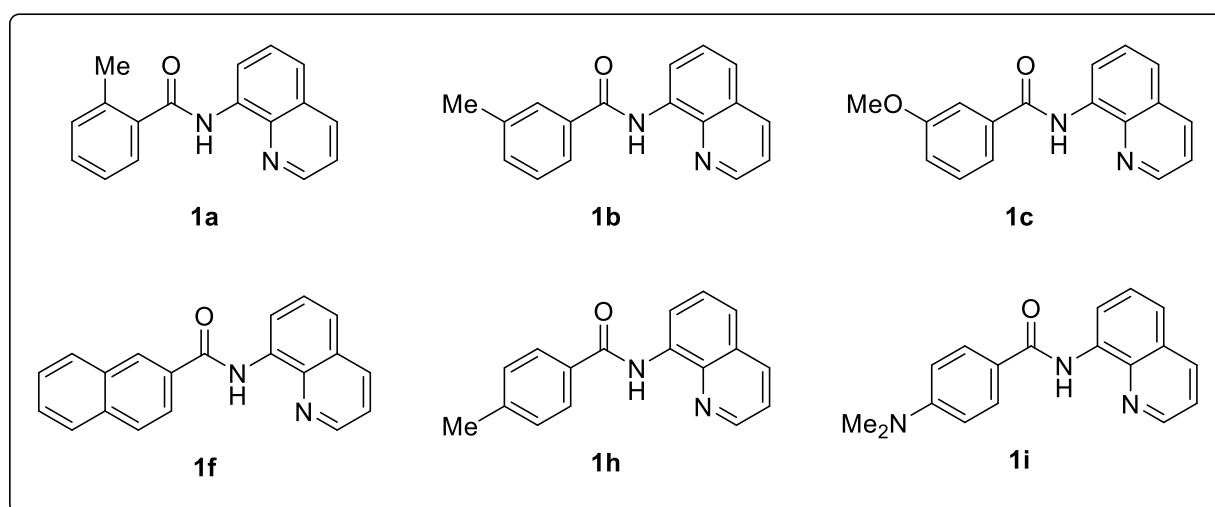

To an oven-dried side-arm flask were added 8-aminoquinoline (**8-AQ**, 1.2 equiv),  $\text{Et}_3\text{N}$  (2.0 equiv) and dry  $\text{CH}_2\text{Cl}_2$  (1.0 M), and the resulting solution was stirred at  $0\text{ }^\circ\text{C}$  for 10 minutes. To the reaction mixture was added a solution of acid chloride in  $\text{CH}_2\text{Cl}_2$  dropwisely at  $0\text{ }^\circ\text{C}$ , and the solution was then warmed to room temperature. After being stirred overnight, the reaction mixture was quenched with sat.  $\text{NH}_4\text{Cl}$  aq. and the organic layer was extracted with EtOAc three times. The combined organic layers were dried over  $\text{Na}_2\text{SO}_4$  and concentrated in vacuo. The residue was purified by flash column chromatography on silica gel (hexane / EtOAc = 5 / 1 – 2 / 1) to afford desired aromatic amides **1**.

## General Procedure B

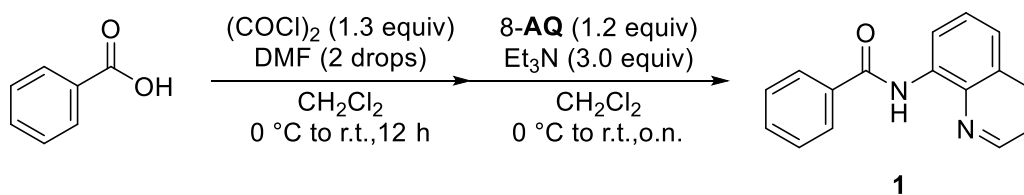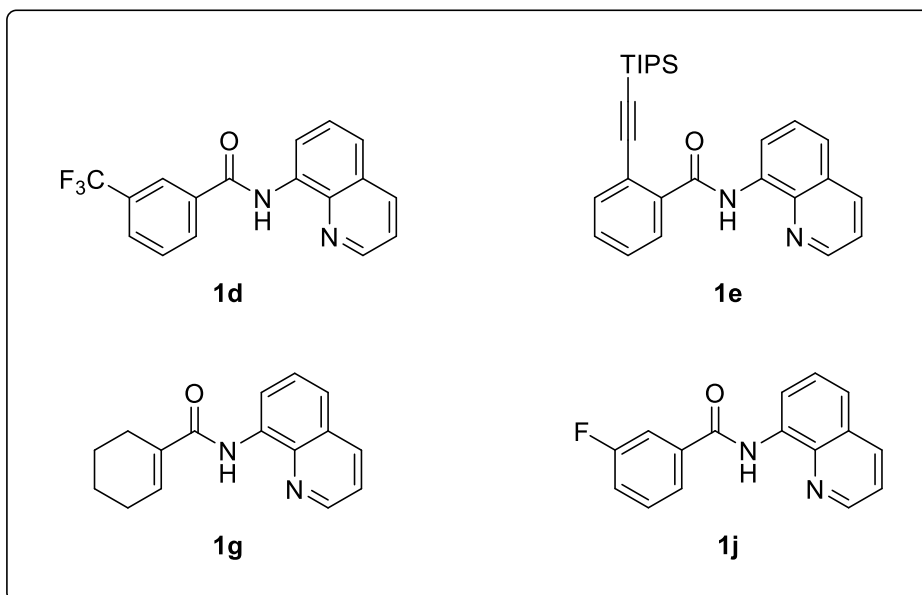

To an oven-dried side-arm flask were added benzoic acid, DMF (2 drops) and dry  $\text{CH}_2\text{Cl}_2$  (0.3 M) under  $\text{N}_2$  atmosphere. Oxalyl chloride (1.3 equiv) was added dropwise at  $0\text{ }^\circ\text{C}$ . The reaction mixture was stirred at room temperature for 12 h. The resulting acid chloride was used immediately without further purification. To another oven-dried side-arm flask were added 8-aminoquinoline (**8-AQ**, 1.2 equiv),  $\text{Et}_3\text{N}$  (3.0 equiv) and dry  $\text{CH}_2\text{Cl}_2$  (1.0 M), and the resulting solution was stirred at  $0\text{ }^\circ\text{C}$  for 10 minutes. To the reaction mixture was added a solution of the acid chloride in  $\text{CH}_2\text{Cl}_2$  dropwisely at  $0\text{ }^\circ\text{C}$ , and the solution was then warmed to room temperature. After being stirred overnight, the reaction mixture was quenched with sat.  $\text{NH}_4\text{Cl}$  aq. and the organic layer was extracted with EtOAc three times. The combined organic layers were dried over  $\text{Na}_2\text{SO}_4$  and concentrated *in vacuo*. The residue was purified by flash column chromatography on silica gel (hexane / EtOAc = 5 / 1 – 3 / 1) to afford desired aromatic amides **1**.

### 3. Characterization Data of Unreported Alkylsilyl Peroxides

#### Triethyl((1-phenylcyclohexyl)peroxy)silane (2b)

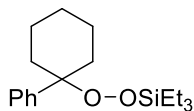

Colorless oil.

$^1\text{H NMR}$  (500 MHz,  $\text{CDCl}_3$ )  $\delta$  7.46 (2H, d,  $J = 7.4$  Hz), 7.31 (2H, t,  $J = 7.7$  Hz), 7.23 (1H, t,  $J = 7.4$  Hz), 2.17-2.14 (2H, m), 1.80-1.67 (5H, m), 1.55-1.51 (2H, m), 1.31-1.26 (1H, m), 0.93 (9H, t,  $J = 7.9$  Hz), 0.65 (6H, q,  $J = 7.9$  Hz).

$^{13}\text{C NMR}$  (125 MHz,  $\text{CDCl}_3$ )  $\delta$  146.0, 127.9, 126.8, 126.2, 83.9, 34.5, 25.8, 22.3, 6.9, 3.9.

**HRMS (ESI)** calculated for  $\text{C}_{18}\text{H}_{30}\text{O}_2\text{SiNa}$ :  $m/z$  329.1907 ( $[\text{M} + \text{Na}]^+$ ), found:  $m/z$  329.1908 ( $[\text{M} + \text{Na}]^+$ ).

#### Triethyl((1-phenylcycloheptyl)peroxy)silane (2e)

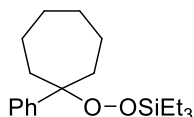

Colorless oil.

$^1\text{H NMR}$  (500 MHz,  $\text{CDCl}_3$ )  $\delta$  7.47-7.44 (2H, m), 7.32-7.29 (2H, m), 7.23-7.20 (1H, m), 2.13 (2H, ddd,  $J = 14.9, 9.0, 1.3$  Hz), 2.02 (2H, ddd,  $J = 14.9, 9.8, 1.3$  Hz), 1.79-1.72 (2H, m), 1.69-1.62 (2H, m), 1.59-1.49 (4H, m), 0.95 (9H, t,  $J = 7.9$  Hz), 0.67 (6H, q,  $J = 7.9$  Hz).

$^{13}\text{C NMR}$  (125 MHz,  $\text{CDCl}_3$ )  $\delta$  147.2, 127.9, 126.6, 126.1, 88.7, 38.2, 30.6, 23.2, 6.9, 3.9.

**HRMS (ESI)** calculated for  $\text{C}_{19}\text{H}_{32}\text{O}_2\text{SiNa}$ :  $m/z$  343.2064 ( $[\text{M} + \text{Na}]^+$ ), found:  $m/z$  343.2068 ( $[\text{M} + \text{Na}]^+$ ).

#### Triethyl((4-phenyltetrahydro-2H-pyran-4-yl)peroxy)silane (2f)

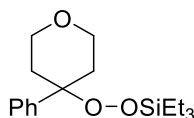

Colorless oil.

$^1\text{H NMR}$  (500 MHz,  $\text{CDCl}_3$ )  $\delta$  7.44 (2H, d,  $J = 7.7$  Hz), 7.34 (2H, t,  $J = 7.5$  Hz), 7.28-7.26 (3H, m), 3.87-3.79 (4H, m), 2.18 (2H, m), 2.11-2.04 (2H, m), 0.90 (9H, t,  $J = 7.9$  Hz), 0.63 (6H, q,  $J = 7.9$  Hz).

$^{13}\text{C NMR}$  (125 MHz,  $\text{CDCl}_3$ )  $\delta$  144.5, 128.1, 127.4, 126.0, 81.2, 64.1, 34.3, 6.8, 3.9.

**HRMS (ESI)** calculated for C<sub>17</sub>H<sub>28</sub>O<sub>3</sub>SiNa: *m/z* 331.1700 ([M + Na]<sup>+</sup>), found: *m/z* 331.1701 ([M + Na]<sup>+</sup>).

**((2-Cyclopropyl-1,1-diphenylethyl)peroxy)triethylsilane (2h)**

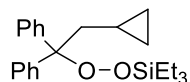

Colorless oil.

**<sup>1</sup>H NMR** (500 MHz, CDCl<sub>3</sub>) δ 7.32-7.30 (4H, m), 7.28-7.24 (4H, m), 7.23-7.20 (2H, m), 2.36 (2H, d, *J* = 6.5 Hz), 1.30-1.26 (1H, m), 0.86 (9H, t, *J* = 7.9 Hz), 0.56 (6H, q, *J* = 7.9 Hz), 0.25-0.22 (2H, m), -0.11- -0.14 (2H, m).

**<sup>13</sup>C NMR** (125 MHz, CDCl<sub>3</sub>) δ 144.5, 127.9, 127.5, 126.9, 89.3, 41.4, 6.8, 6.1, 4.7, 3.9.

**HRMS (ESI)** calculated for C<sub>23</sub>H<sub>32</sub>O<sub>2</sub>SiNa: *m/z* 391.2064 ([M + Na]<sup>+</sup>), found: *m/z* 391.2064 ([M + Na]<sup>+</sup>).

**((2,3-Dimethylbutan-2-yl)peroxy)triethylsilane (2i)**

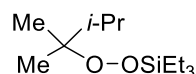

Colorless oil.

**<sup>1</sup>H NMR** (500 MHz, CDCl<sub>3</sub>) δ 1.96-1.90 (1H, m), 1.12 (6H, s), 0.98 (9H, t, *J* = 7.9 Hz), 0.87 (6H, d, *J* = 7.1 Hz), 0.66 (6H, q, *J* = 7.9 Hz).

**<sup>13</sup>C NMR** (125 MHz, CDCl<sub>3</sub>) δ 85.0, 34.6, 21.3, 17.7, 7.0, 4.0.

**HRMS (ESI)** calculated for C<sub>12</sub>H<sub>28</sub>O<sub>2</sub>SiNa: *m/z* 255.1751 ([M + Na]<sup>+</sup>), found: *m/z* 255.1751 ([M + Na]<sup>+</sup>).

**3,7-Dimethyl-1-(5-phenyl-5-((triethylsilyl)peroxy)hexyl)-3,7-dihydro-1H-purine-2,6-dione (2j)**

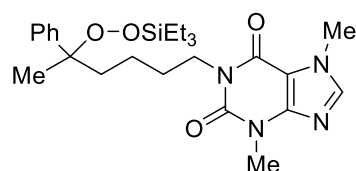

Colorless oil.

**<sup>1</sup>H NMR** (500 MHz, CDCl<sub>3</sub>) δ 7.48 (1H, s), 7.36 (2H, d, *J* = 7.5 Hz), 7.30 (2H, t, *J* = 7.7 Hz), 7.21 (1H, t, *J* = 7.5 Hz), 3.97 (3H, s), 3.92 (2H, t, *J* = 7.8 Hz), 3.55 (3H, s), 1.92-1.78 (2H, m), 1.61 (3H, s), 1.56 (2H, m), 1.31-1.22 (2H, m), 0.97 (9H, t, *J* = 7.9 Hz), 0.68 (6H, q, *J* = 7.9 Hz).

**<sup>13</sup>C NMR** (125 MHz, CDCl<sub>3</sub>)  $\delta$  155.3, 151.5, 148.8, 144.9, 141.5, 127.9, 126.7, 125.9, 107.7, 85.7, 41.3, 40.2, 33.6, 29.7, 28.3, 23.7, 21.4, 6.9, 3.9.

**HRMS (ESI)** calculated for C<sub>25</sub>H<sub>38</sub>O<sub>4</sub>N<sub>4</sub>SiNa:  $m/z$  509.2555 ([M + Na]<sup>+</sup>), found:  $m/z$  509.2558 ([M + Na]<sup>+</sup>).



#### 4. Synthesis of Triethyl((2-phenyldecan-2-yl)peroxy)silane (**2g**)

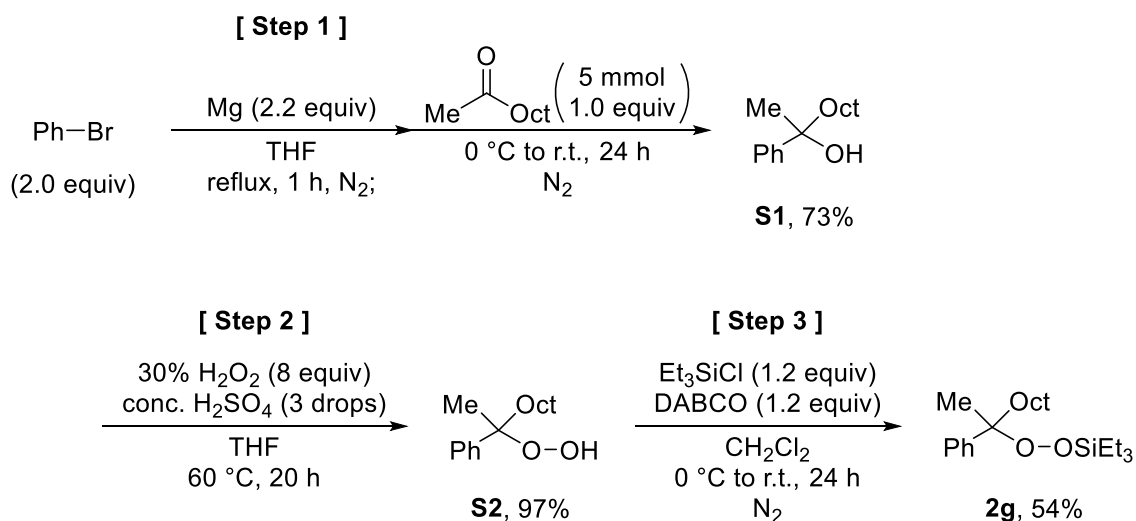

##### [ Step 1 ]

To a suspension of flame-dried Mg turnings (0.27 g, 11 mmol, 2.2 equiv) in dry THF (13 mL) was added PhBr (1.1 mL, 10 mmol, 2.0 equiv) carefully under N<sub>2</sub> atmosphere. After being refluxed for 1 h, the obtained solution of PhMgBr was cooled down to 0 °C and then decane-2,3-dione (0.95 mL, 5 mmol, 1.0 equiv) was added dropwisely. After being stirred at room temperature for 24 h, the reaction mixture was quenched with sat. NH<sub>4</sub>Cl aq. at 0 °C and extracted with EtOAc three times. The combined organic layers were dried over Na<sub>2</sub>SO<sub>4</sub> and concentrated *in vacuo*. The residue was purified by flash column chromatography on silica gel (hexane / EtOAc = 8 / 1) to afford **S1** as a colorless oil (0.91 g, 73%). Spectral data of **S1** matched those previously reported in the literature.<sup>[5]</sup>

##### [ Step 2 ]<sup>[6]</sup>

To a solution of **S1** (683 mg, 2.8 mmol, 1.0 equiv) in THF (3 mL) was added a mixture of 30% H<sub>2</sub>O<sub>2</sub> aq. (2.5 mL) with a few drops of conc. H<sub>2</sub>SO<sub>4</sub> slowly. After being stirred at 60 °C for 20 h, the reaction mixture was diluted with H<sub>2</sub>O and then extracted with CH<sub>2</sub>Cl<sub>2</sub> three times. The combined organic layers were dried over Na<sub>2</sub>SO<sub>4</sub> and concentrated *in vacuo*. The residue was purified by flash column chromatography on silica gel (CH<sub>2</sub>Cl<sub>2</sub>) to afford hydroperoxide **S2** as a colorless oil (686 mg, 94%). Spectral data of **S2** matched those previously reported in the literature.<sup>[6]</sup>

##### [ Step 3 ]

To a solution of **S2** (686 mg, 2.6 mmol, 1.0 equiv) and 1,4-diazabicyclo[2.2.2]octane (DABCO, 349 mg, 3.1 mmol, 1.3 equiv) in dry CH<sub>2</sub>Cl<sub>2</sub> (10 mL) was added Et<sub>3</sub>SiCl (523 μL, 3.1 mmol, 1.3

equiv) dropwisely at 0 °C under N<sub>2</sub> atmosphere. After being stirred at room temperature for 24 h, the reaction mixture was diluted with H<sub>2</sub>O and then extracted with CH<sub>2</sub>Cl<sub>2</sub> three times. The combined organic layers were dried over Na<sub>2</sub>SO<sub>4</sub> and concentrated *in vacuo*. The residue was purified by flash column chromatography on silica gel (hexane / CH<sub>2</sub>Cl<sub>2</sub>= 20 / 1) to afford triethyl((2-phenyldecan-2-yl)peroxy)silane (**2g**) as a colorless oil (533 mg, 54%).

**<sup>1</sup>H NMR** (500 MHz, CDCl<sub>3</sub>) δ 7.39-7.37 (2H, m), 7.33-7.29 (2H, m), 7.24-7.22 (1H, m), 1.80-1.73 (2H, m), 1.60 (3H, s), 1.28-1.12 (12H, m), 0.98 (9H, t, *J* = 8.0 Hz), 0.86 (3H, t, *J* = 7.5 Hz), 0.68 (6H, q, *J* = 7.5 Hz).

**<sup>13</sup>C NMR** (125 MHz, CDCl<sub>3</sub>) δ 145.3, 127.9, 126.7, 126.0, 85.9, 40.6, 32.0, 30.1, 29.6, 29.4, 24.0, 23.6, 22.8, 14.2, 6.9, 4.0.

**HRMS (ESI)** calculated for C<sub>22</sub>H<sub>40</sub>O<sub>2</sub>SiNa: *m/z* 387.2690 ([M + Na]<sup>+</sup>), found: *m/z* 387.2698 ([M + Na]<sup>+</sup>).

## 5. Optimization of Reaction Conditions

### 5-1. Ethylation Reactions of Benzamides 1h–1j Using 2.0 equiv of ASP 2a without LiBr

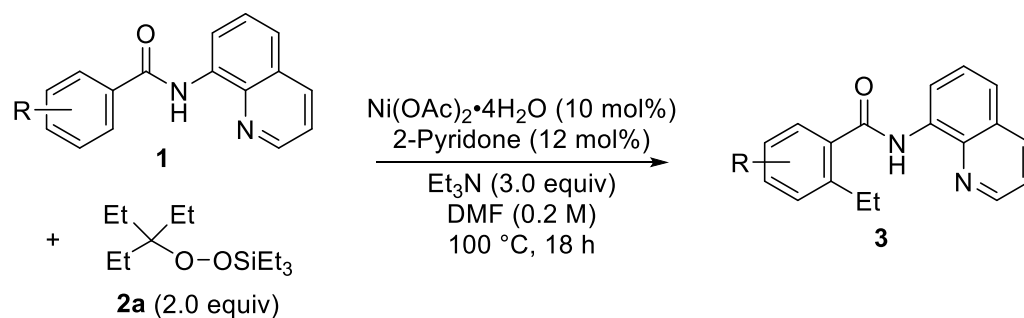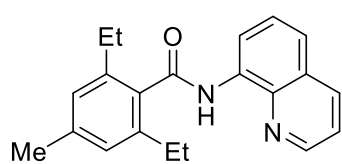

**3h + 3h'**, 78%  
di (**3h**) / mono (**3h'**)  
= 44 / 34

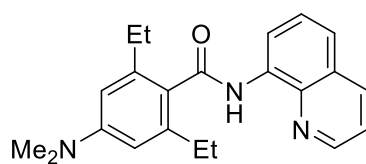

**3i + 3i'**, 89%  
di (**3i**) / mono (**3i'**)  
= 57 / 32

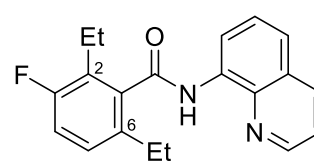

**3j + 3j'**, 79%  
di (**3j**) / mono 6-Et (**3j'**)  
= 40 / 39

## 5-2. Effect of Additives on the Reaction with Cyclic ASP 2b

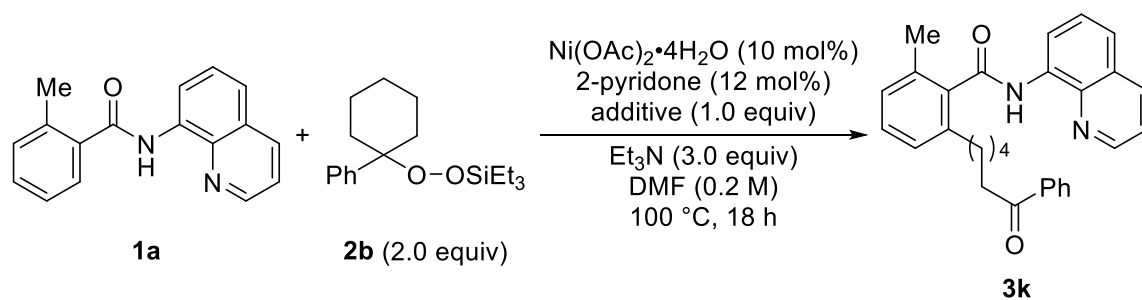

| entry | additive            | <b>1a</b> (%) <sup>b</sup> | <b>3k</b> (%) <sup>b</sup> |
|-------|---------------------|----------------------------|----------------------------|
| 1     | -                   | 67                         | 8                          |
| 2     | LiCl                | 46                         | 43                         |
| 3     | LiBr                | 0                          | 94 (85 <sup>c</sup> )      |
| 4     | LiI                 | 84                         | 22                         |
| 5     | LiBF <sub>4</sub>   | 75                         | 13                         |
| 6     | NaBr                | trace                      | 85                         |
| 7     | KBr                 | 53                         | 22                         |
| 8     | Bu <sub>4</sub> NBr | 52                         | 37                         |

<sup>a</sup>The reactions were performed on a 0.2 mmol scale in DMF (1.0 mL) under a N<sub>2</sub> atmosphere. <sup>b</sup>Yields were determined by <sup>1</sup>H NMR spectroscopy using 1,1,2,2-tetrachloroethane as an internal standard. <sup>c</sup>Isolated yield.

## 6. General Procedures for Ni-catalyzed AQ-directed C(sp<sup>2</sup>)-H Alkylation Reactions with ASPs

### General Procedure A

To the solution of benzamide **1** (0.2 mmol, 1.0 equiv), Ni(OAc)<sub>2</sub>•4H<sub>2</sub>O (5.0 mg, 0.02 mmol, 10 mol%), and 2-pyridone (2.3 mg, 0.024 mmol, 12 mol%) in DMF (1.0 mL) were added ASP **2** (0.4 mmol, 2.0 equiv) and Et<sub>3</sub>N (84 μL, 0.6 mmol, 3.0 equiv) at room temperature under N<sub>2</sub> atmosphere. The reaction mixture was stirred at 100 °C for 18 h. After being cooled to room temperature, the reaction mixture was passed through a short silica gel / Na<sub>2</sub>SO<sub>4</sub> plug eluting with EtOAc. The obtained solution was concentrated and the residue was purified by flash column chromatography on silica gel to afford desired coupling products.

### General Procedure B

To the solution of benzamide **1** (0.2 mmol, 1.0 equiv), Ni(OAc)<sub>2</sub>•4H<sub>2</sub>O (5.0 mg, 0.02 mmol, 10 mol%), 2-pyridone (2.3 mg, 0.024 mmol, 12 mol%), and LiBr (17.4 mg, 0.2 mmol, 1.0 equiv) in DMF (1.0 mL) were added ASP **2** (0.4 mmol, 2.0 equiv) and Et<sub>3</sub>N (84 μL, 0.6 mmol, 3.0 equiv) at room temperature under N<sub>2</sub> atmosphere. The reaction mixture was stirred at 100 °C for 18 h. After being cooled to room temperature, the reaction mixture was passed through a short silica gel / Na<sub>2</sub>SO<sub>4</sub> plug eluting with EtOAc. The obtained solution was concentrated and the residue was purified by flash column chromatography on silica gel to afford desired coupling products.

### General Procedure C

To the solution of benzamide **1** (0.2 mmol, 1.0 equiv), Ni(OAc)<sub>2</sub>•4H<sub>2</sub>O (5.0 mg, 0.02 mmol, 10 mol%), 2-pyridone (2.3 mg, 0.024 mmol, 12 mol%), and LiBr (17.4 mg, 0.2 mmol, 1.0 equiv) in DMF (1.0 mL) were added ASP **2** (0.8 mmol, 4.0 equiv) and Et<sub>3</sub>N (84 μL, 0.6 mmol, 3.0 equiv) at room temperature under N<sub>2</sub> atmosphere. The reaction mixture was stirred at 100 °C for 18 h. After being cooled to room temperature, the reaction mixture was passed through a short silica gel / Na<sub>2</sub>SO<sub>4</sub> plug eluting with EtOAc. The obtained solution was concentrated and the residue was purified by flash column chromatography on silica gel to afford desired coupling products.

### General Procedure D

To the solution of benzamide **1** (0.2 mmol, 1.0 equiv), Ni(OAc)<sub>2</sub>•4H<sub>2</sub>O (5.0 mg, 0.02 mmol, 10 mol%), 2-pyridone (2.3 mg, 0.024 mmol, 12 mol%), and LiBr (17.4 mg, 0.2 mmol, 1.0 equiv) in DMF (1.0 mL) were added ASP **2** (0.4 mmol, 2.0 equiv) and Et<sub>3</sub>N (84 μL, 0.6 mmol, 3.0 equiv) at room temperature under N<sub>2</sub> atmosphere. After the reaction mixture was stirred at 100 °C for 9 h, an

additional ASP 2 (0.4 mmol, 2.0 equiv) was added and the mixture was further stirred at 100 °C for 9 h. After being cooled to room temperature, the reaction mixture was passed through a short silica gel / Na<sub>2</sub>SO<sub>4</sub> plug eluting with EtOAc. The obtained solution was concentrated and the residue was purified by flash column chromatography on silica gel to afford desired coupling products.

### 2-Ethyl-6-methyl-N-(quinolin-8-yl)benzamide (3a)

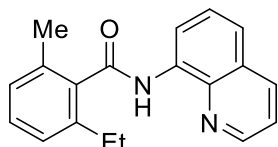

White solid, 46.7 mg, 80% yield (procedure A).

<sup>1</sup>H NMR (500 MHz, CDCl<sub>3</sub>) δ 9.93 (1H, s), 9.00 (1H, d, *J* = 7.4 Hz), 8.74 (1H, dd, *J* = 4.2, 1.5 Hz), 8.18 (1H, dd, *J* = 8.2, 1.7 Hz), 7.63-7.56 (2H, m), 7.45 (1H, dd, *J* = 8.3, 4.3 Hz), 7.30 (1H, t, *J* = 7.7 Hz), 7.15 (2H, dd, *J* = 21.7, 7.5 Hz), 2.76 (2H, q, *J* = 7.6 Hz), 2.43 (3H, s), 1.27 (3H, t, *J* = 7.5 Hz).

The spectral data of this compound are consistent with those previously reported in the literature.<sup>[2]</sup>

### 2-Ethyl-5-methyl-N-(quinolin-8-yl)benzamide (3b)

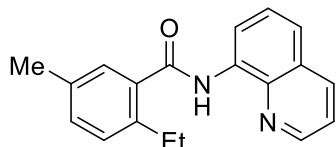

Colorless oil, 42.0 mg, 72% yield (procedure A).

<sup>1</sup>H NMR (500 MHz, CDCl<sub>3</sub>) δ 10.14 (1H, s), 8.95 (1H, d, *J* = 7.7 Hz), 8.78 (1H, dd, *J* = 4.1, 1.6 Hz), 8.18 (1H, dd, *J* = 8.4, 1.6 Hz), 7.62-7.54 (2H, m), 7.47-7.44 (2H, m), 7.25 (2H, s), 2.90 (2H, q, *J* = 7.6 Hz), 2.40 (3H, s), 1.28 (3H, t, *J* = 7.5 Hz).

The spectral data of this compound are consistent with those previously reported in the literature.<sup>[7]</sup>

### 2-Ethyl-5-methoxy-N-(quinolin-8-yl)benzamide (3c)

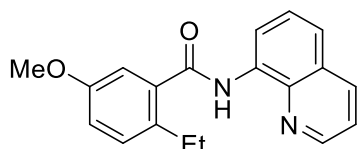

White solid, 44.4 mg, 72% yield (procedure A).

<sup>1</sup>H NMR (500 MHz, CDCl<sub>3</sub>) δ 10.17 (1H, s), 8.95 (1H, d, *J* = 6.8 Hz), 8.77 (1H, dd, *J* = 4.3, 2.0 Hz), 8.18 (1H, dd, *J* = 8.2, 1.4 Hz), 7.60-7.54 (2H, m), 7.45 (1H, m), 7.27-7.26 (1H, m), 7.18 (1H, d, *J* = 2.6 Hz), 6.99 (1H, dd, *J* = 8.5, 2.6 Hz), 3.85 (3H, s), 2.87 (2H, q, *J* = 7.8 Hz), 1.28 (3H, t, *J* = 7.7 Hz). The spectral data of this compound are consistent with those previously reported in the literature.<sup>[7]</sup>

### 2-Ethyl-*N*-(quinolin-8-yl)-5-(trifluoromethyl)benzamide (3d)

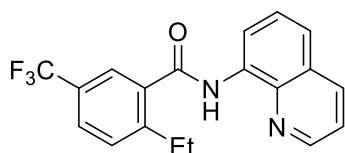

White solid, 50.4 mg, 73% yield (procedure A).

<sup>1</sup>H NMR (500 MHz, CDCl<sub>3</sub>) δ 10.18 (1H, s), 8.92 (1H, dd, *J* = 6.8, 1.7 Hz), 8.79 (1H, dd, *J* = 4.5, 1.5 Hz), 8.20 (1H, dd, *J* = 8.4, 1.6 Hz), 7.87 (1H, s), 7.69 (1H, d, *J* = 6.8 Hz), 7.64-7.58 (2H, m), 7.48 (2H, q, *J* = 4.2 Hz), 2.99 (2H, q, *J* = 7.6 Hz), 1.33 (3H, t, *J* = 7.5 Hz).

The spectral data of this compound are consistent with those previously reported in the literature.<sup>[8]</sup>

### 2-Ethyl-*N*-(quinolin-8-yl)-6-((triisopropylsilyl)ethynyl)benzamide (3e)

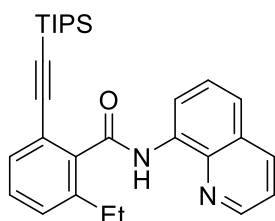

Colorless oil, 72.2 mg, 79% yield (procedure A).

<sup>1</sup>H NMR (500 MHz, CDCl<sub>3</sub>) δ 10.07 (1H, s), 9.00 (1H, dd, *J* = 7.4, 1.4 Hz), 8.73 (1H, dd, *J* = 4.1, 1.6 Hz), 8.16 (1H, dd, *J* = 8.2, 1.7 Hz), 7.60-7.53 (2H, m), 7.44-7.41 (2H, m), 7.35-7.28 (2H, m), 2.79 (2H, q, *J* = 7.6 Hz), 1.27 (3H, t, *J* = 7.5 Hz), 0.78-0.76 (21H, m).

The spectral data of this compound are consistent with those previously reported in the literature.<sup>[2]</sup>

### 3-Ethyl-*N*-(quinolin-8-yl)-2-naphthamide (3f)

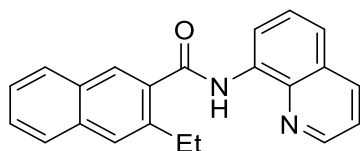

White solid, 46.4 mg, 71% yield (procedure A).

<sup>1</sup>H NMR (500 MHz, CDCl<sub>3</sub>) δ 10.32 (1H, s), 8.99 (1H, d, *J* = 7.7 Hz), 8.77 (1H, m), 8.20 (1H, m), 8.16 (1H, s), 7.91 (1H, d, *J* = 7.9 Hz), 7.85 (1H, d, *J* = 7.9 Hz), 7.78 (1H, s), 7.63 (1H, t, *J* = 7.9 Hz), 7.59-7.45 (4H, m), 3.12 (2H, q, *J* = 7.6 Hz), 1.37 (3H, t, *J* = 7.5 Hz).

The spectral data of this compound are consistent with those previously reported in the literature.<sup>[9]</sup>

### 2-Ethyl-*N*-(quinolin-8-yl)cyclohex-1-ene-1-carboxamide (3g)

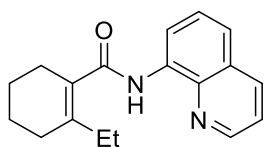

White foam, 36.7 mg, 75% yield (procedure B).

<sup>1</sup>H NMR (500 MHz, CDCl<sub>3</sub>) δ 9.84 (1H, s), 8.86 (1H, d, *J* = 7.7 Hz), 8.81 (1H, dd, *J* = 4.1, 1.6 Hz), 8.17 (1H, dd, *J* = 8.4, 1.6 Hz), 7.57-7.50 (2H, m), 7.45 (1H, dd, *J* = 8.3, 4.2 Hz), 2.43 (2H, s), 2.28 (2H, q, *J* = 7.5 Hz), 2.17-2.14 (2H, m), 1.74-1.67 (4H, m), 1.12 (3H, t, *J* = 7.5 Hz).

The spectral data of this compound are consistent with those previously reported in the literature.<sup>[9]</sup>

### 2,6-Diethyl-4-methyl-*N*-(quinolin-8-yl)benzamide (3h)

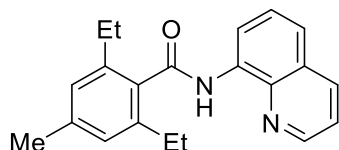

Colorless oil, 45.5 mg, 71% yield (procedure C).

<sup>1</sup>H NMR (500 MHz, CDCl<sub>3</sub>) δ 9.94 (1H, s), 8.99 (1H, d, *J* = 7.4 Hz), 8.72 (1H, dd, *J* = 3.8, 1.3 Hz), 8.17 (1H, dd, *J* = 8.2, 1.4 Hz), 7.62-7.55 (2H, m), 7.44 (1H, dd, *J* = 6.3, 4.2 Hz), 6.99 (2H, s), 2.86-2.25 (4H, q, *J* = 7.5 Hz), 2.38 (3H, s), 1.27 (6H, t, *J* = 7.5 Hz).

<sup>13</sup>C NMR (125 MHz, CDCl<sub>3</sub>) δ 169.3, 148.4, 140.9, 139.2, 138.6, 136.4, 134.7, 134.6, 128.1, 127.6, 127.0, 121.9, 121.8, 116.8, 26.6, 21.5, 16.1.

HRMS (ESI) calculated for C<sub>21</sub>H<sub>23</sub>ON<sub>2</sub>: *m/z* 319.1805 ([M + H]<sup>+</sup>), found: *m/z* 319.1806 ([M + H]<sup>+</sup>).

### 2-Ethyl-4-methyl-*N*-(quinolin-8-yl)benzamide (3h')

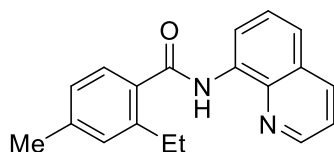

Colorless oil, 20.0 mg, 34% yield (procedure A).



**<sup>1</sup>H NMR** (500 MHz, CDCl<sub>3</sub>) δ 10.18 (1H, s), 8.94 (1H, d, *J* = 7.1 Hz), 8.77 (1H, dd, *J* = 4.1, 0.8 Hz), 8.18 (1H, dt, *J* = 8.2, 1.3 Hz), 7.61-7.53 (3H, m), 7.45 (1H, m), 7.16-7.12 (2H, m), 2.93 (2H, q, *J* = 7.6 Hz), 2.41 (3H, s), 1.30 (3H, t, *J* = 7.7 Hz).

The spectral data of this compound are consistent with those previously reported in the literature.<sup>[8]</sup>

#### 4-(Dimethylamino)-2,6-diethyl-*N*-(quinolin-8-yl)benzamide (3i)

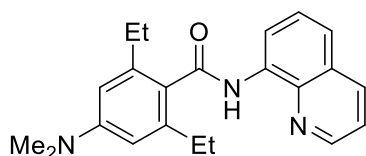

Yellow oil, 50.9 mg, 73% yield (procedure C).

**<sup>1</sup>H NMR** (500 MHz, CDCl<sub>3</sub>) δ 9.94 (1H, s), 9.00 (1H, d, *J* = 7.4 Hz), 8.71 (1H, dd, *J* = 4.3, 2.0 Hz), 8.16 (1H, dd, *J* = 8.2, 1.7 Hz), 7.60 (1H, t, *J* = 7.9 Hz), 7.55-7.53 (1H, m), 7.43 (1H, dd, *J* = 8.5, 4.2 Hz), 6.51 (2H, s), 3.01 (6H, s), 2.73 (4H, q, *J* = 7.5 Hz), 1.27 (6H, t, *J* = 7.5 Hz).

**<sup>13</sup>C NMR** (125 MHz, CDCl<sub>3</sub>) δ 169.8, 151.2, 148.3, 142.3, 138.6, 136.4, 135.0, 128.1, 127.6, 126.3, 121.7, 121.6, 116.6, 110.2, 40.6, 27.3, 16.3.

**HRMS (ESI)** calculated for C<sub>22</sub>H<sub>26</sub>ON<sub>3</sub>: *m/z* 348.2070 ([*M* + H]<sup>+</sup>), found: *m/z* 348.2075 ([*M* + H]<sup>+</sup>).

#### 4-(Dimethylamino)-2-ethyl-*N*-(quinolin-8-yl)benzamide (3i')

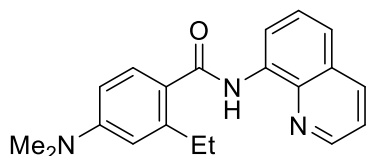

Yellow oil, 20.3 mg, 32% yield (procedure A).

**<sup>1</sup>H NMR** (500 MHz, CDCl<sub>3</sub>) δ 10.21 (1H, s), 8.92 (1H, d, *J* = 7.7 Hz), 8.77 (1H, dd, *J* = 4.0, 1.4 Hz), 8.17 (1H, dd, *J* = 8.2, 1.4 Hz), 7.65 (1H, d, *J* = 9.1 Hz), 7.58 (1H, t, *J* = 7.9 Hz), 7.51 (1H, d, *J* = 7.4 Hz), 7.44 (1H, dd, *J* = 4.2 Hz), 6.64-6.62 (2H, m), 3.18-2.89 (8H, m), 1.33 (3H, t, *J* = 7.5 Hz).

The spectral data of this compound are consistent with those previously reported in the literature.<sup>[9]</sup>

#### 2,6-Diethyl-3-fluoro-*N*-(quinolin-8-yl)benzamide (3j) and 2-Ethyl-5-fluoro-*N*-(quinolin-8-yl)benzamide (3j')

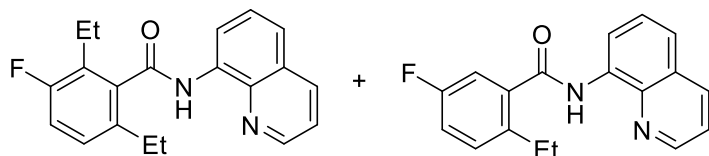

Colorless oil, 48.7 mg, 79% yield (**3j**: 40%, **3j'**: 39%, procedure A).

33.0 mg, 52% yield (**3j**: 44%, **3j'**: 8%, procedure C).

Each product was characterized by analyzing the  $^1\text{H}$  NMR of a mixture of products, **3j** / **3j'** = 1.0 / 0.96.

$^1\text{H}$  NMR (500 MHz,  $\text{CDCl}_3$ )  $\delta$  10.16 (0.96H, s), 9.95 (1H, s), 8.97 (1H, dd,  $J = 7.2, 1.6$  Hz), 8.92 (0.96H,  $J = 7.2, 1.6$  Hz), 8.79 (0.96H, dd,  $J = 4.5, 2.0$  Hz), 8.74 (1H, dd,  $J = 4.5, 2.0$  Hz), 8.20 (1.96H, m), 7.64-7.57 (3.92H, m), 7.49-7.45 (1.92H, m), 7.36-7.28 (1.96H, m), 7.16-7.12 (1.96H, m), 7.07 (1H, t,  $J = 9.5$  Hz), 2.90 (1.92H, q,  $J = 7.6$  Hz), 2.71 (4H, q,  $J = 7.6$  Hz), 1.31-1.23 (8.76H, m).

$^{13}\text{C}$  NMR (125 MHz,  $\text{CDCl}_3$ )  $\delta$  167.5, 167.1, 160.8 (d,  $J = 247$  Hz), 159.6 (d,  $J = 245$  Hz), 148.5 (Two peaks were overlapped.), 138.7 (d,  $J = 3.6$  Hz), 138.6, 138.5, 137.8 (d,  $J = 6.0$  Hz), 136.54 (Two peaks were overlapped.), 136.51, 136.4 (d,  $J = 3.6$  Hz), 134.6, 134.3, 131.5 (d,  $J = 7.2$  Hz), 128.1 (Two peaks were overlapped.), 128.0, 127.8, 127.7, 127.5 (Two peaks were overlapped.), 122.3, 122.2, 121.9 (Two peaks were overlapped.), 117.3 (d,  $J = 20$  Hz), 116.9, 116.8, 116.2 (d,  $J = 23$  Hz), 114.3 (d,  $J = 23$  Hz), 26.1, 26.0, 20.9 (d,  $J = 2.4$  Hz), 16.3, 16.1, 15.5.

HRMS (ESI) (**3j**) calculated for  $\text{C}_{20}\text{H}_{20}\text{ON}_2\text{F}$ :  $m/z$  323.1554 ( $[\text{M} + \text{H}]^+$ ), found:  $m/z$  323.1554 ( $[\text{M} + \text{H}]^+$ ).

HRMS (ESI) (**3j'**) calculated for  $\text{C}_{18}\text{H}_{16}\text{ON}_2\text{F}$ :  $m/z$  295.1241 ( $[\text{M} + \text{H}]^+$ ), found:  $m/z$  295.1249 ( $[\text{M} + \text{H}]^+$ ).

### 2-Methyl-6-(6-oxo-6-phenylhexyl)-*N*-(quinolin-8-yl)benzamide (**3k**)

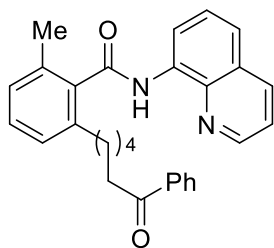

Yellow oil, 74.6 mg, 85% yield (procedure B).

$^1\text{H}$  NMR (500 MHz,  $\text{CDCl}_3$ )  $\delta$  9.92 (1H, s), 8.97 (1H, dd,  $J = 7.1, 1.7$  Hz), 8.71 (1H, dd,  $J = 4.1, 1.6$  Hz), 8.16 (1H, dd,  $J = 8.2, 1.7$  Hz), 7.86 (2H, dd,  $J = 8.3, 1.3$  Hz), 7.60-7.51 (3H, m), 7.43-7.40 (3H, m), 7.30-7.26 (2H, m), 7.13 (2H, dd,  $J = 10.1, 7.8$  Hz), 2.83 (2H, t,  $J = 7.4$  Hz), 2.74 (2H, t,  $J = 7.8$  Hz), 2.43 (3H, s), 1.77-1.71 (2H, m), 1.69-1.63 (2H, m), 1.41-1.35 (2H, m).

$^{13}\text{C}$  NMR (125 MHz,  $\text{CDCl}_3$ )  $\delta$  200.5, 169.0, 148.4, 139.4, 138.6, 137.9, 137.1, 136.5, 134.7, 134.5, 133.0, 129.2, 128.6, 128.4, 128.2, 128.0, 127.6, 127.0, 122.1, 121.8, 116.9, 38.5, 33.5, 31.5, 29.3, 24.2, 19.7.

**HRMS (ESI)** calculated for  $C_{29}H_{29}O_2N_2$ :  $m/z$  437.2224 ( $[M + H]^+$ ), found:  $m/z$  437.2219 ( $[M + H]^+$ ).

### 2-Methyl-6-(5-oxoheptyl)-*N*-(quinolin-8-yl)benzamide (3l)

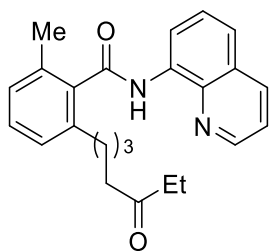

Yellow oil, 63.1 mg, 84% yield (procedure B).

**$^1H$  NMR** (500 MHz,  $CDCl_3$ )  $\delta$  9.91 (1H, s), 8.98 (1H, dd,  $J = 7.5, 1.6$  Hz), 8.74 (1H, dd,  $J = 4.3, 2.0$  Hz), 8.19 (1H, dd,  $J = 8.2, 1.7$  Hz), 7.63-7.56 (2H, m), 7.45 (1H, dd,  $J = 8.3, 4.2$  Hz), 7.29-7.26 (1H, m), 7.13 (2H, t,  $J = 6.7$  Hz), 2.71 (2H, t,  $J = 7.8$  Hz), 2.42 (3H, s), 2.29 (2H, t,  $J = 7.5$  Hz), 2.25 (2H, q,  $J = 7.4$  Hz), 1.70-1.64 (2H, m), 1.57-1.53 (2H, m), 0.92 (3H, t,  $J = 7.4$  Hz).

**$^{13}C$  NMR** (125 MHz,  $CDCl_3$ )  $\delta$  211.6, 168.9, 148.4, 138.9, 138.6, 137.8, 136.4, 134.6, 134.4, 129.2, 128.1, 128.0, 127.5, 126.9, 122.1, 121.8, 116.8, 42.1, 35.8, 33.3, 31.3, 23.7, 19.6, 7.8.

**HRMS (ESI)** calculated for  $C_{24}H_{26}O_2N_2Na$ :  $m/z$  397.1886 ( $[M + Na]^+$ ), found:  $m/z$  397.1885 ( $[M + Na]^+$ ).

### 2-Methyl-6-(5-oxo-5-phenylpentyl)-*N*-(quinolin-8-yl)benzamide (3m)

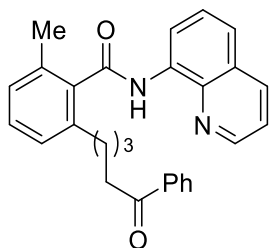

Yellow oil, 68.6 mg, 81% yield (procedure B).

**$^1H$  NMR** (500 MHz,  $CDCl_3$ )  $\delta$  9.93 (1H, s), 8.99 (1H, dd,  $J = 7.4, 1.4$  Hz), 8.71 (1H, dd,  $J = 4.3, 1.4$  Hz), 8.17 (1H, dd,  $J = 8.2, 1.7$  Hz), 7.76-7.75 (2H, m), 7.63-7.56 (2H, m), 7.51-7.48 (1H, m), 7.42 (1H, dd,  $J = 8.3, 4.2$  Hz), 7.36 (2H, t,  $J = 7.8$  Hz), 7.30-7.27 (1H, m), 7.14 (2H, dd,  $J = 16.9, 7.8$  Hz), 2.85 (2H, t,  $J = 7.2$  Hz), 2.77 (2H, t,  $J = 7.7$  Hz), 2.43 (3H, s), 1.83-1.70 (4H, m).

**$^{13}C$  NMR** (125 MHz,  $CDCl_3$ )  $\delta$  200.2, 169.0, 148.4, 139.0, 138.6, 137.9, 137.0, 136.4, 134.7, 134.5, 132.9, 129.2, 128.5, 128.1, 128.04, 128.01, 127.5, 126.9, 122.1, 121.8, 116.9, 38.3, 33.3, 31.3, 24.0, 19.6.

**HRMS (ESI)** calculated for  $C_{28}H_{26}O_2N_2Na$ :  $m/z$  445.1886 ( $[M + Na]^+$ ), found:  $m/z$  445.1887 ( $[M + Na]^+$ ).

**2-Methyl-6-(7-oxo-7-phenylheptyl)-N-(quinolin-8-yl)benzamide (3n)**

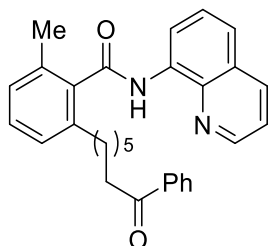

Yellow oil, 79.0 mg, 88% yield (procedure B).

**$^1H$  NMR** (500 MHz,  $CDCl_3$ )  $\delta$  9.93 (1H, s), 8.99 (1H, dd,  $J = 7.5, 1.3$  Hz), 8.72 (1H, dd,  $J = 4.1, 1.6$  Hz), 8.14 (1H, dd,  $J = 8.5, 1.4$  Hz), 7.87 (2H, dd,  $J = 8.4, 1.3$  Hz), 7.60 (1H, t,  $J = 7.9$  Hz), 7.56-7.53 (2H, m), 7.45-7.40 (3H, m), 7.29-7.26 (1H, m), 7.13 (2H, dd,  $J = 10.6, 7.8$  Hz), 2.76 (2H, t,  $J = 7.4$  Hz), 2.71 (2H, t,  $J = 7.8$  Hz), 2.43 (3H, s), 1.73-1.67 (2H, m), 1.59 (2H, m), 1.35-1.27 (4H, m).

**$^{13}C$  NMR** (125 MHz,  $CDCl_3$ )  $\delta$  200.5, 169.1, 148.5, 139.5, 138.6, 137.9, 137.1, 136.4, 134.7, 134.6, 133.0, 129.2, 128.6, 128.16, 128.13, 127.9, 127.6, 126.9, 122.1, 121.8, 116.9, 38.6, 33.5, 31.7, 29.4, 29.2, 24.2, 19.7.

**HRMS (ESI)** calculated for  $C_{30}H_{30}O_2N_2Na$ :  $m/z$  473.2199 ( $[M + Na]^+$ ), found:  $m/z$  473.2193 ( $[M + Na]^+$ ).

**2-Methyl-6-(2-(3-oxo-3-phenylpropoxy)ethyl)-N-(quinolin-8-yl)benzamide (3o)**

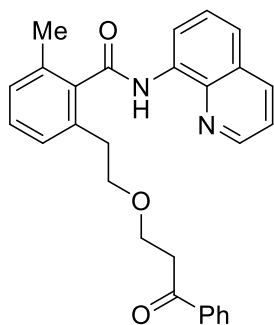

Yellow oil, 20.7 mg, 24% yield (procedure D).

**$^1H$  NMR** (500 MHz,  $CDCl_3$ )  $\delta$  9.96 (1H, s), 8.98 (1H, dd,  $J = 7.4, 1.0$  Hz), 8.72 (1H, dd,  $J = 4.1, 1.3$  Hz), 8.16 (1H, dd,  $J = 8.2, 1.4$  Hz), 7.83 (2H, d,  $J = 7.4$  Hz), 7.62-7.51 (3H, m), 7.43-7.39 (3H, m), 7.28-7.25 (1H, m), 7.15 (2H, dd,  $J = 16, 7.5$  Hz), 3.80 (2H, t,  $J = 6.5$  Hz), 3.75 (2H, t,  $J = 7.0$  Hz), 3.11 (2H, t,  $J = 6.5$  Hz), 3.00 (2H, t,  $J = 7.0$  Hz), 2.42 (3H, s).

$^{13}\text{C}$  NMR (125 MHz,  $\text{CDCl}_3$ )  $\delta$  198.6, 168.8, 148.4, 138.7, 138.4, 137.0, 136.5, 135.7, 134.7, 134.5, 133.2, 129.2, 128.6, 128.5, 128.20, 128.16, 127.63, 127.56, 122.2, 121.8, 117.0, 72.0, 66.3, 38.8, 33.9, 19.7.

HRMS (ESI) calculated for  $\text{C}_{28}\text{H}_{26}\text{O}_3\text{N}_2\text{Na}$ :  $m/z$  461.1836 ( $[\text{M} + \text{Na}]^+$ ), found:  $m/z$  461.1831 ( $[\text{M} + \text{Na}]^+$ ).

### 2-Methyl-6-octyl-*N*-(quinolin-8-yl)benzamide (3p)

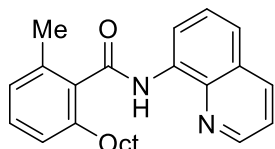

Colorless oil, 45.4 mg, 58% yield (procedure B).

$^1\text{H}$  NMR (500 MHz,  $\text{CDCl}_3$ )  $\delta$  9.92 (1H, s), 8.99 (1H, d,  $J = 7.7$  Hz), 8.73 (1H, d,  $J = 6.0$  Hz), 8.18 (1H, d,  $J = 8.2$  Hz), 7.63-7.56 (2H, m), 7.46-7.42 (1H, m), 7.34 (1H, t,  $J = 7.5$  Hz), 7.15-7.11 (2H, m), 2.70 (2H, t,  $J = 7.9$  Hz), 2.43 (3H, s), 1.68-1.65 (2H, m), 1.25-1.21 (2H, m), 1.16-1.07 (8H, m), 0.78 (3H, t,  $J = 7.2$  Hz).

The spectral data of this compound are consistent with those previously reported in the literature.<sup>[3]</sup>

### 2-(But-3-en-1-yl)-6-methyl-*N*-(quinolin-8-yl)benzamide (3q)

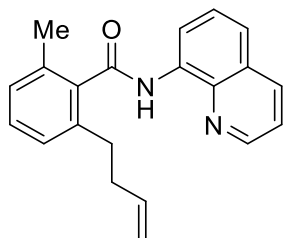

Colorless oil, 34.1 mg, 54% yield (procedure B).

$^1\text{H}$  NMR (500 MHz,  $\text{CDCl}_3$ )  $\delta$  9.93 (1H, s), 8.99 (1H, d,  $J = 7.7$  Hz), 8.74-8.73 (1H, dd,  $J = 4.0, 1.4$  Hz), 8.19 (1H, dd,  $J = 8.2, 1.1$  Hz), 7.63-7.57 (2H, m), 7.45 (1H, dd,  $J = 8.2, 4.2$  Hz), 7.29 (1H, t,  $J = 7.7$  Hz), 7.16-7.13 (2H, m), 5.83-5.74 (1H, m), 4.94-4.86 (2H, m), 2.82 (2H, m), 2.44 (5H, m).

The spectral data of this compound are consistent with those previously reported in the literature.<sup>[3]</sup>

## 7. Synthesis of 2-(4-(3,7-Dimethyl-2,6-dioxo-2,3,6,7-tetrahydro-1H-purin-1-yl)butyl)-6-methyl-N-(quinolin-8-yl)benzamide (3s)

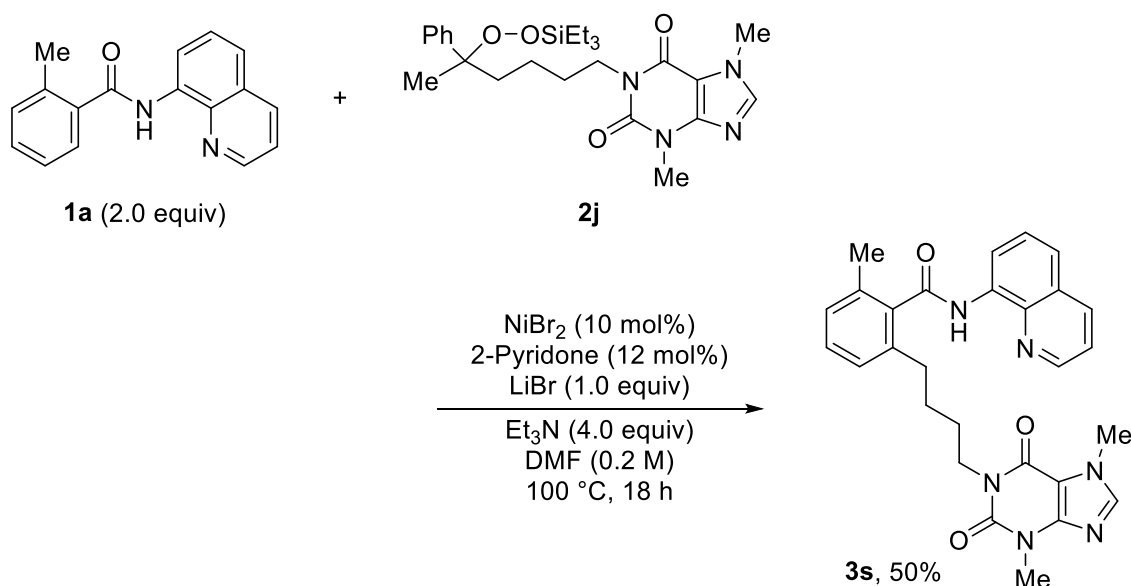

To the solution of ASP **2j** (97.3 mg, 0.2 mmol, 1.0 equiv), benzamide **1a** (104 mg, 0.4 mmol, 2.0 equiv), NiBr<sub>2</sub> (4.4 mg, 0.02 mmol, 10 mol%), 2-pyridone (2.3 mg, 0.024 mmol, 12 mol%), and LiBr (17.4 mg, 0.2 mmol, 1.0 equiv) in DMF (1.0 mL) was added Et<sub>3</sub>N (84  $\mu$ L, 0.6 mmol, 3.0 equiv) at room temperature under N<sub>2</sub> atmosphere. The reaction mixture was stirred at 100 °C for 18 h. After being cooled to room temperature, the reaction mixture was passed through a short silica gel / Na<sub>2</sub>SO<sub>4</sub> plug eluting with EtOAc. The obtained solution was concentrated and the residue was purified by flash column chromatography on silica gel to afford desired coupling products **3s** as a colorless oil (49.5 mg, 50%).

**<sup>1</sup>H NMR** (500 MHz, CDCl<sub>3</sub>)  $\delta$  9.90 (1H, s), 8.95 (1H, d,  $J$  = 7.4 Hz), 8.71 (1H, dd,  $J$  = 4.3, 1.4 Hz), 8.17 (1H, d,  $J$  = 8.2 Hz), 7.62-7.55 (2H, m), 7.45 (1H, s), 7.43 (1H, dd,  $J$  = 8.3, 4.2 Hz), 7.29-7.26 (1H, m), 7.14 (2H, dd,  $J$  = 27.5, 7.7 Hz), 3.97-3.94 (2H, m), 3.93 (3H, s), 3.50 (3H, s), 2.77 (2H, t,  $J$  = 7.7 Hz), 2.41 (3H, s), 1.80-1.61 (4H, m).

**<sup>13</sup>C NMR** (125 MHz, CDCl<sub>3</sub>)  $\delta$  168.9, 155.3, 151.5, 148.8, 148.4, 141.4, 139.1, 138.7, 137.9, 136.4, 134.6, 134.5, 129.2, 128.1, 128.0, 127.6, 127.0, 122.0, 121.8, 117.0, 107.8, 41.3, 33.7, 33.2, 29.8, 29.0, 28.1, 19.7.

**HRMS (ESI)** calculated for C<sub>28</sub>H<sub>28</sub>O<sub>3</sub>N<sub>6</sub>Na:  $m/z$  519.2115 ([M + Na]<sup>+</sup>), found:  $m/z$  519.2117 ([M + Na]<sup>+</sup>).

## 8. Control Experiments

### 8-1. Competition Experiment (Scheme 3-a)

To a solution of benzamide **1c** (55.6 mg, 0.2 mmol, 1.0 equiv), **1d** (63.3 mg, 0.2 mmol, 1.0 equiv), Ni(OAc)<sub>2</sub>•4H<sub>2</sub>O (5.0 mg, 0.02 mmol, 10 mol%), and 2-pyridone (2.3 mg, 0.024 mmol, 12 mol%) in DMF (1.0 mL) were added ASP **2a** (49.3 mg, 0.2 mmol, 1.0 equiv) and Et<sub>3</sub>N (84 μL, 0.6 mmol, 3.0 equiv) at room temperature under N<sub>2</sub> atmosphere. The reaction mixture was stirred at 100 °C for 18 h. After being cooled to room temperature, the reaction mixture was passed through a short silica gel / Na<sub>2</sub>SO<sub>4</sub> plug eluting with EtOAc. The obtained solution was concentrated and the residue was purified by flash column chromatography on silica gel (hexane / EtOAc / MeOH = 200 / 15 / 1) to afford **3c** (2.5 mg, 4% isolated yield) and **3d** (44.2 mg, 64% isolated yield).

### 8-2. A Control Experiment using Tetrachloromethane (CCl<sub>4</sub>) (Scheme 3-b)

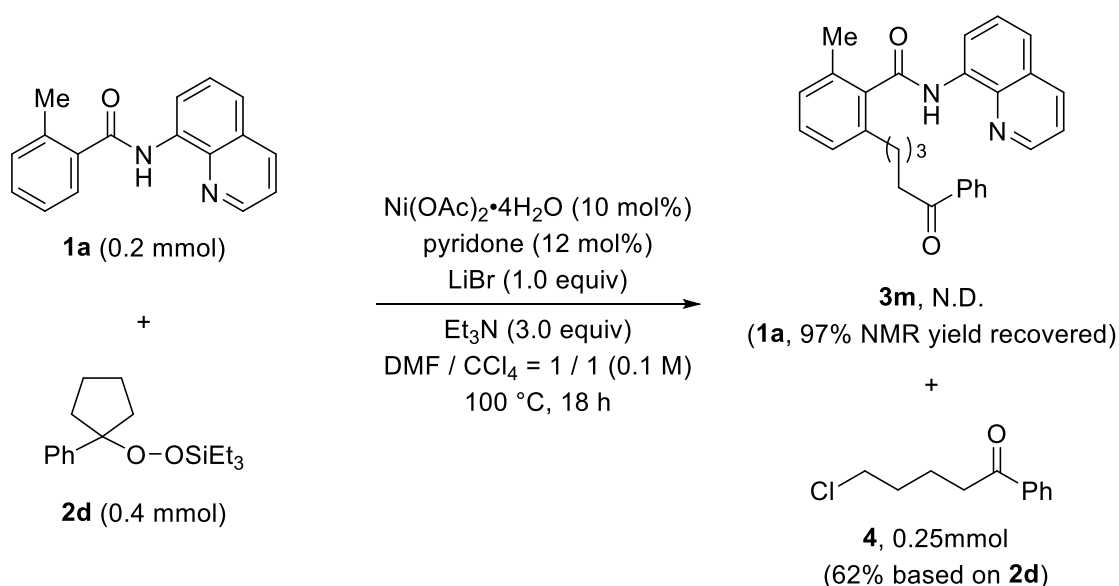

When tetrachloromethane (CCl<sub>4</sub>, 1.0 mL) was added to the reaction (0.2 mmol scale) using benzamide **1a** and ASP **2d**, the desired alkylated product (**3m**) was not detected and **1a** was recovered (97% NMR yield). Instead, 5-chloro-1-phenylpentan-1-one (**4**) was obtained in 62% isolated yield (based on **2d**) as a white solid (29.5 mg), which was purified by flash column chromatography on silica gel (hexane / EtOAc = 10 / 1). <sup>1</sup>H NMR spectrum data of **4** matched the one previously reported in the literature.<sup>[10]</sup>

## 9. References

- [1] (a) R. Sakamoto, S. Sakurai, and K. Maruoka, *Chem. Eur. J.*, **2017**, *23*, 9030.
- [1] (b) R. Sakamoto, T. Kato, S. Sakurai, and K. Maruoka, *Org. Lett.*, **2018**, *20*, 1400.
- [1] (c) S. Sakurai, T. Kato, R. Sakamoto and K. Maruoka, *Tetrahedron*, **2019**, *75*, 172.
- [1] (d) T. Seihara, S. Sakurai, T. Kato, R. Sakamoto, and K. Maruoka, *Org. Lett.*, **2019**, *21*, 2477.
- [1] (e) S. Sakurai, S. Tsuzuki, R. Sakamoto, and K. Maruoka, *J. Org. Chem.*, **2020**, *85*, 3973.
- [2] S.-Y. Zhang, Q. Li, G. He, W. A. Nack and G. Chen, *J. Am. Chem. Soc.*, **2015**, *137*, 531.
- [3] Y. Aihara and N. Chatani, *J. Am. Chem. Soc.*, **2013**, *135*, 5308.
- [4] (a) J. Roane and O. Daugulis, *J. Am. Chem. Soc.*, **2016**, *138*, 4601.
- [1] (b) V. G. Landge, G. Jaiswal, E., K. Balaraman, *Org. Lett.* **2016**, *18*, 812.
- [1] (c) E. R. Fruchey, B. N. Monks and S. P. Cook, *J. Am. Chem. Soc.*, **2014**, *136*, 13130.
- [1] (d) R. Boobalan, R. Kuppasamy, R. Santhoshkumar, P. Gandeepan and C.-H. Cheng, *ChemCatChem*, **2017**, *9*, 273.
- [5] M. O. Ganiu, A. H. Cleveland, J. L. Paul and R. Kartika, *Org. Lett.*, **2019**, *21*, 5611.
- [6] P. C. Too, Y. L. Tnay and S. Chiba, *Beilstein J. Org. Chem.*, **2013**, *9*, 1217.
- [7] L. Ilies, Y. Zhou, H. Yang, T. Matsubara, R. Shang and E. Nakamura, *ACS Catal.*, **2018**, *8*, 11478.
- [8] H. Wang, S. Zhang, Z. Wang, M. He and K. Xu, *Org. Lett.*, **2016**, *18*, 5628.
- [9] K. Xu, Z. Tan, H. Zhang and S. Zhang, *Synthesis*, **2017**, *49*, 3931.
- [10] S. Sakurai, T. Kano and K. Maruoka, *Chem. Commun.*, **2021**, *57*, 81.



## 10. <sup>1</sup>H NMR and <sup>13</sup>C NMR Spectra

<sup>1</sup>H NMR spectrum of **2b** (500 MHz, CDCl<sub>3</sub>)

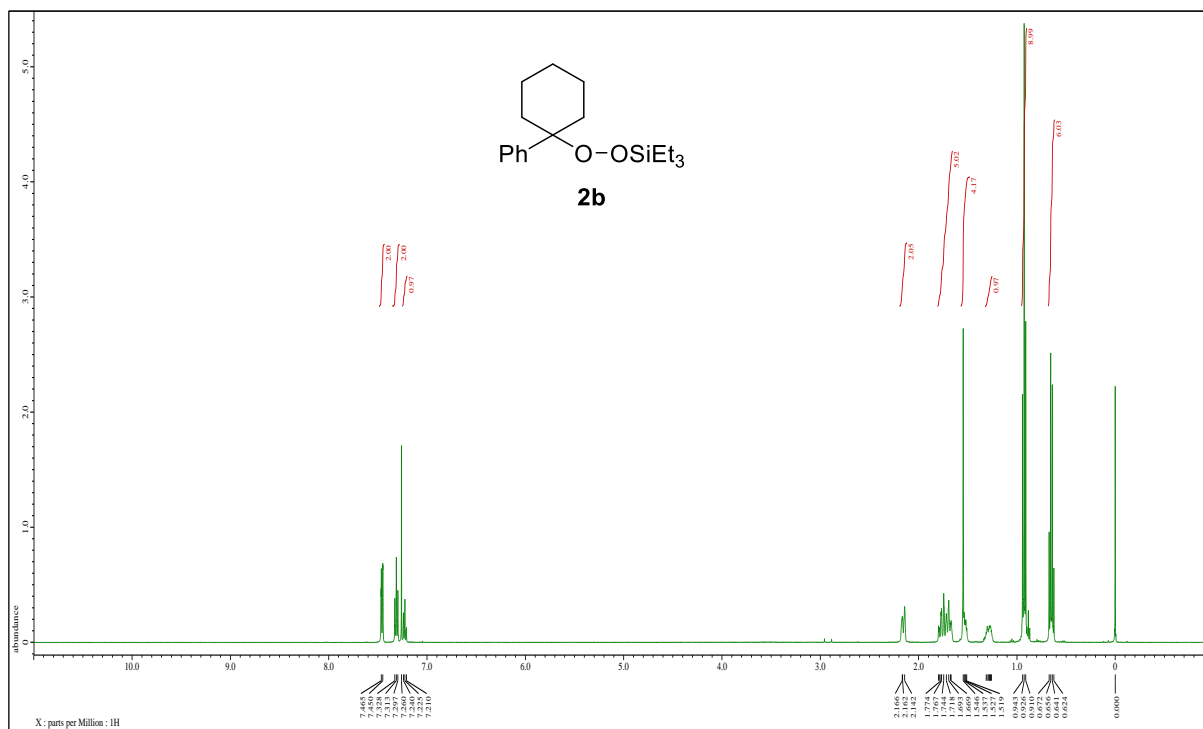

<sup>13</sup>C NMR spectrum of **2b** (125 MHz, CDCl<sub>3</sub>)

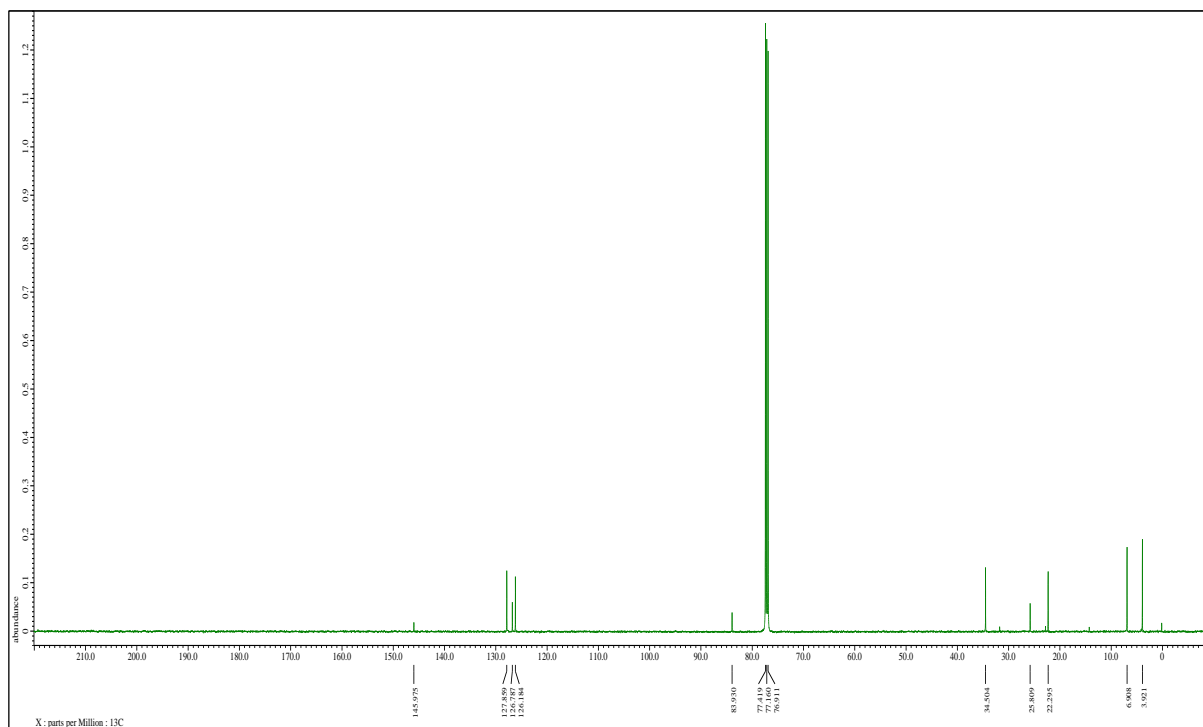

<sup>1</sup>H NMR spectrum of **2e** (500 MHz, CDCl<sub>3</sub>)

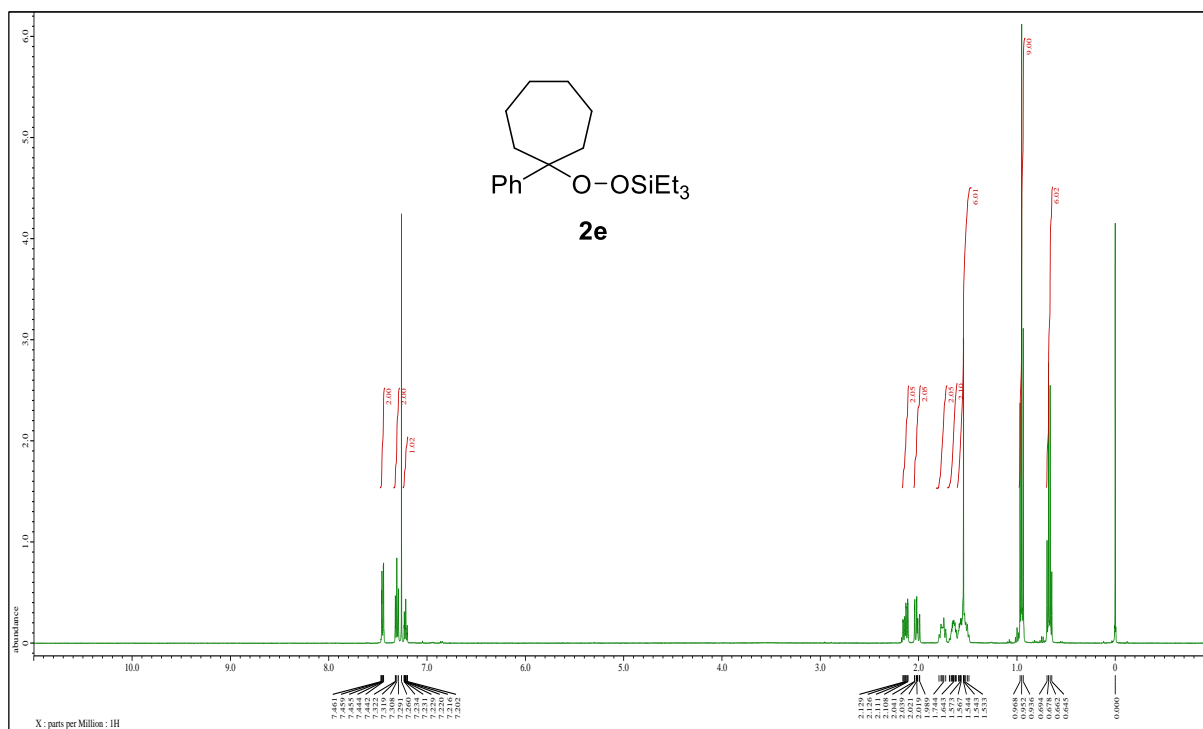

<sup>13</sup>C NMR spectrum of **2e** (125 MHz, CDCl<sub>3</sub>)

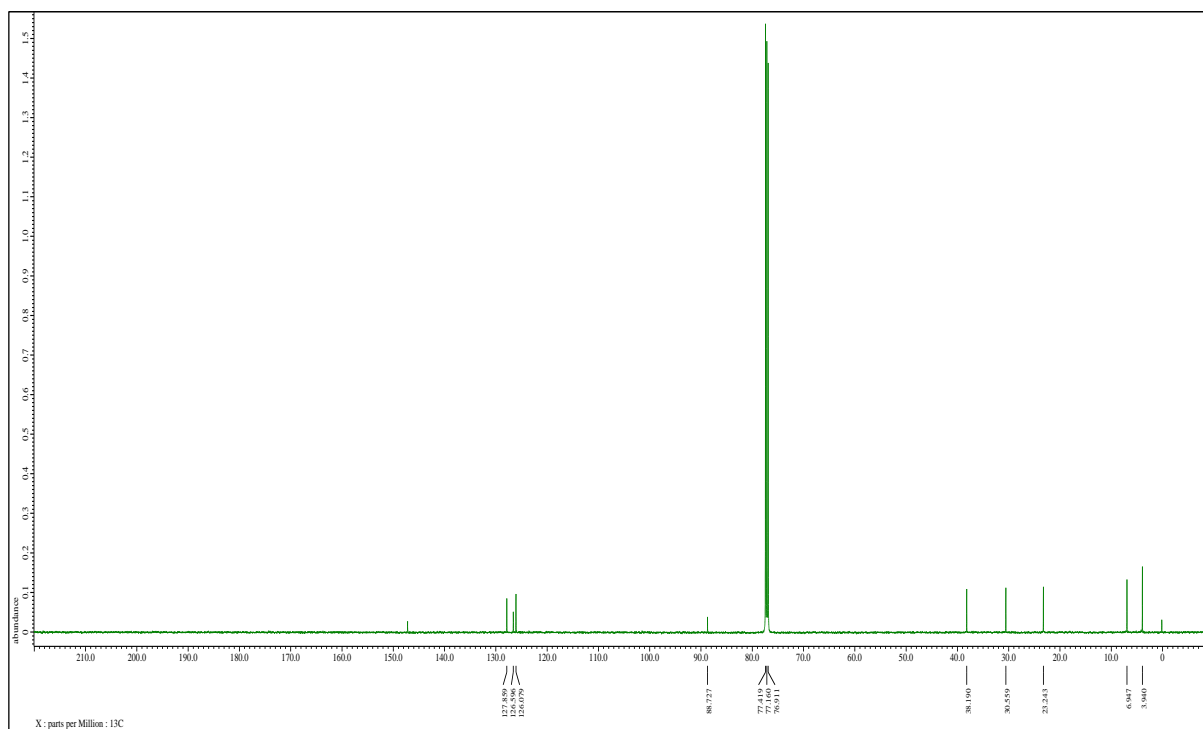

$^1\text{H}$  NMR spectrum of **2f** (500 MHz,  $\text{CDCl}_3$ )

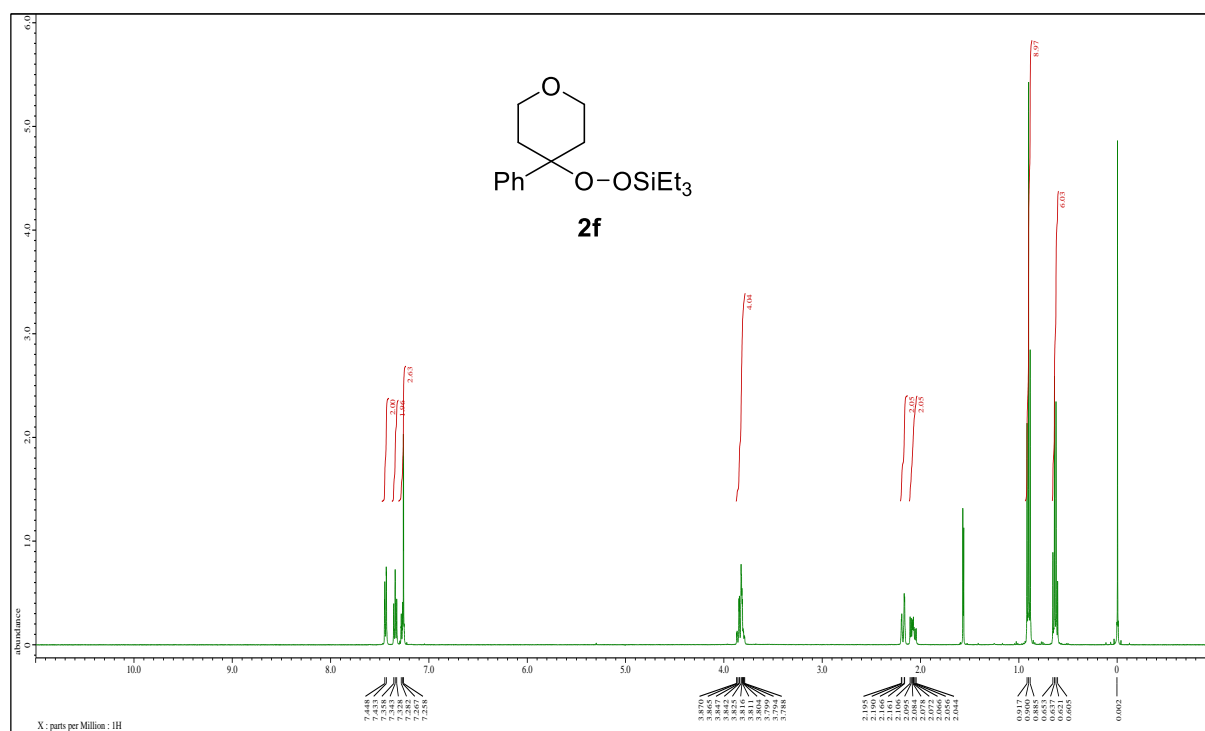

$^{13}\text{C}$  NMR spectrum of **2f** (125 MHz,  $\text{CDCl}_3$ )

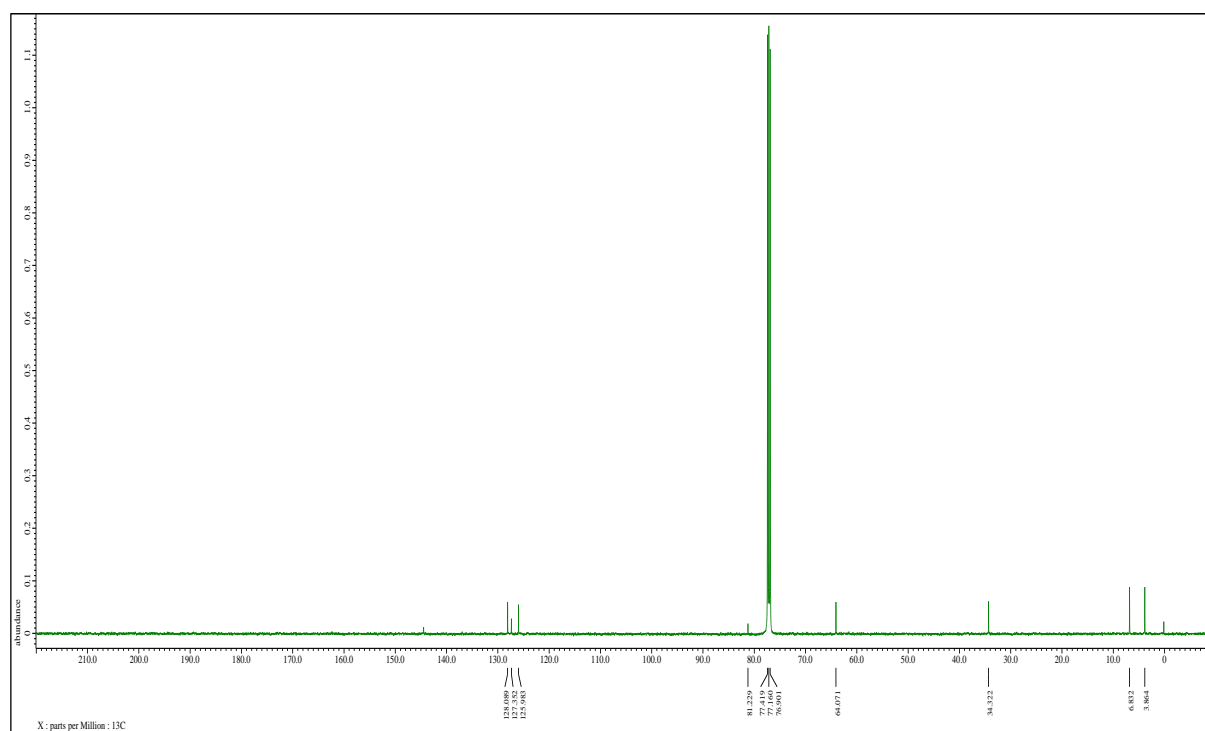

$^1\text{H}$  NMR spectrum of **2g** (500 MHz,  $\text{CDCl}_3$ )

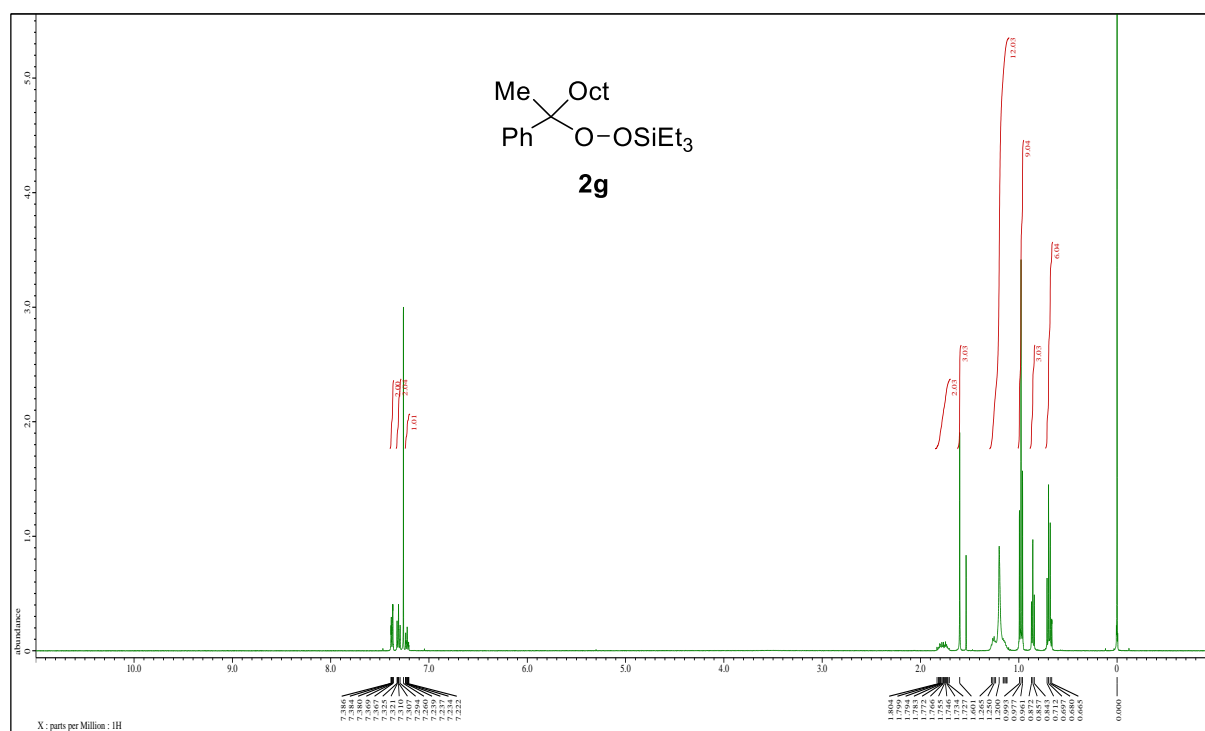

$^{13}\text{C}$  NMR spectrum of **2g** (125 MHz,  $\text{CDCl}_3$ )

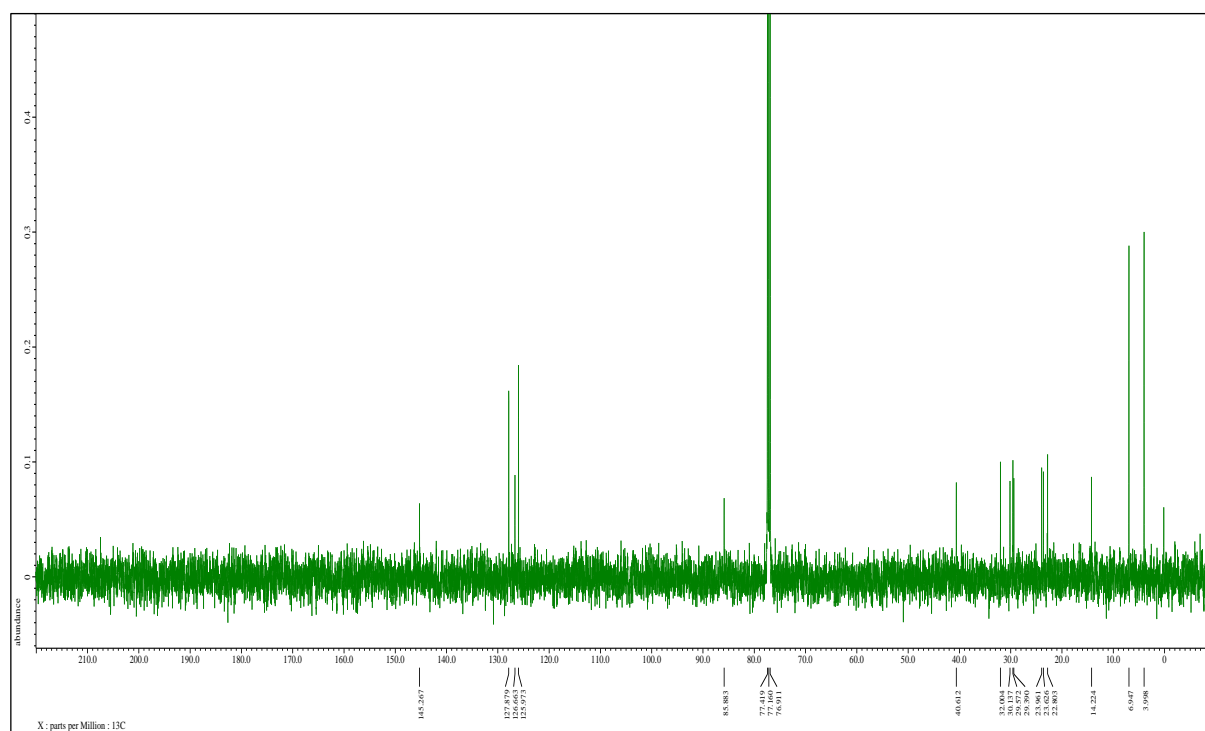

$^1\text{H}$  NMR spectrum of **2h** (500 MHz,  $\text{CDCl}_3$ )

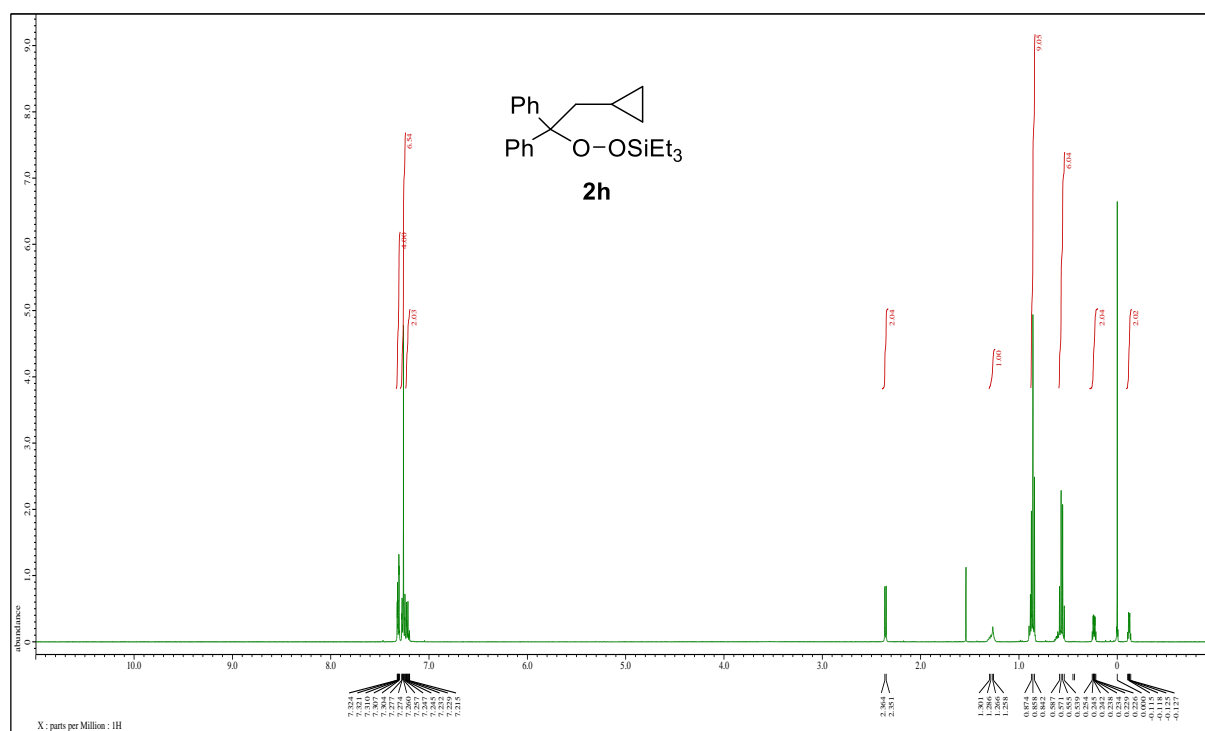

$^{13}\text{C}$  NMR spectrum of **2h** (125 MHz,  $\text{CDCl}_3$ )

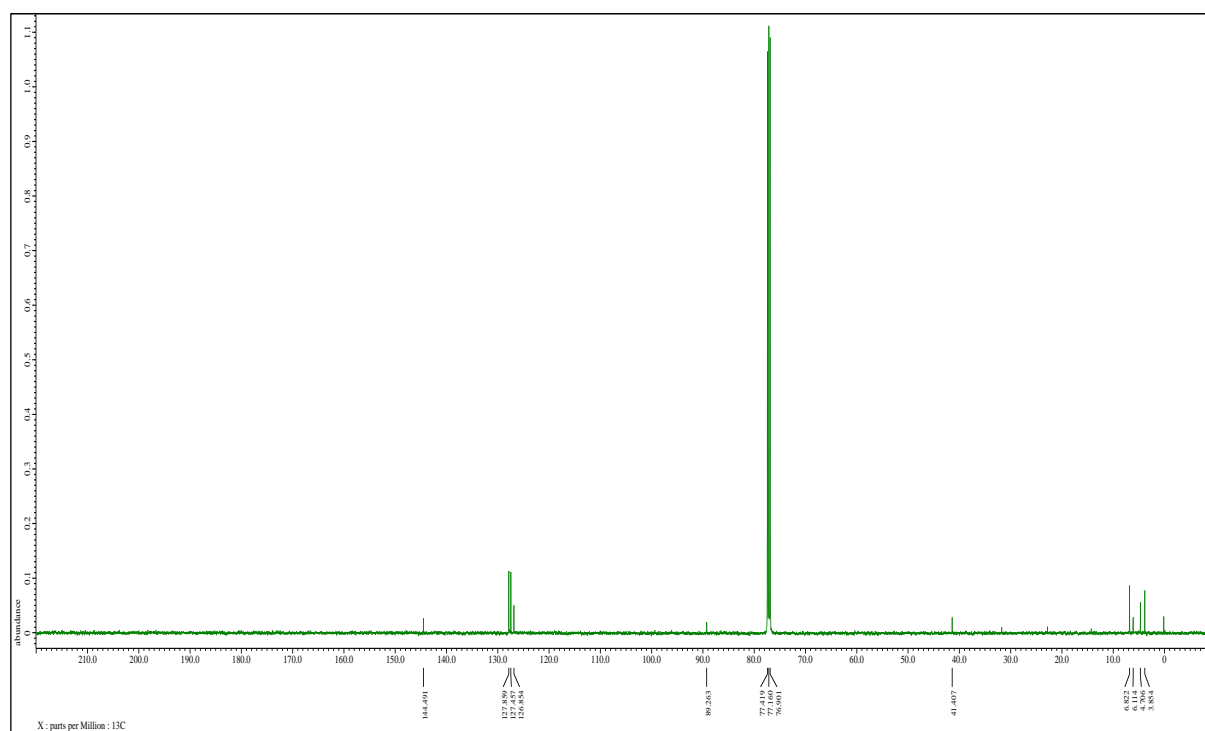

$^1\text{H}$  NMR spectrum of **2i** (500 MHz,  $\text{CDCl}_3$ )

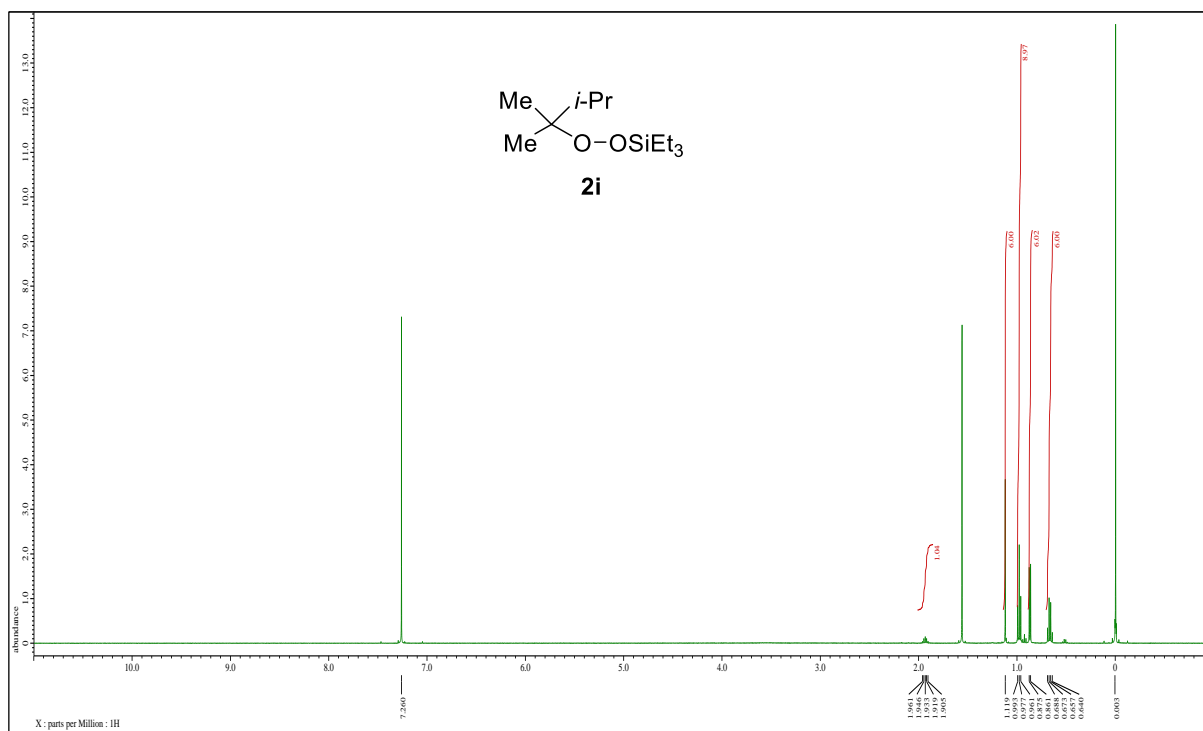

$^{13}\text{C}$  NMR spectrum of **2i** (125 MHz,  $\text{CDCl}_3$ )

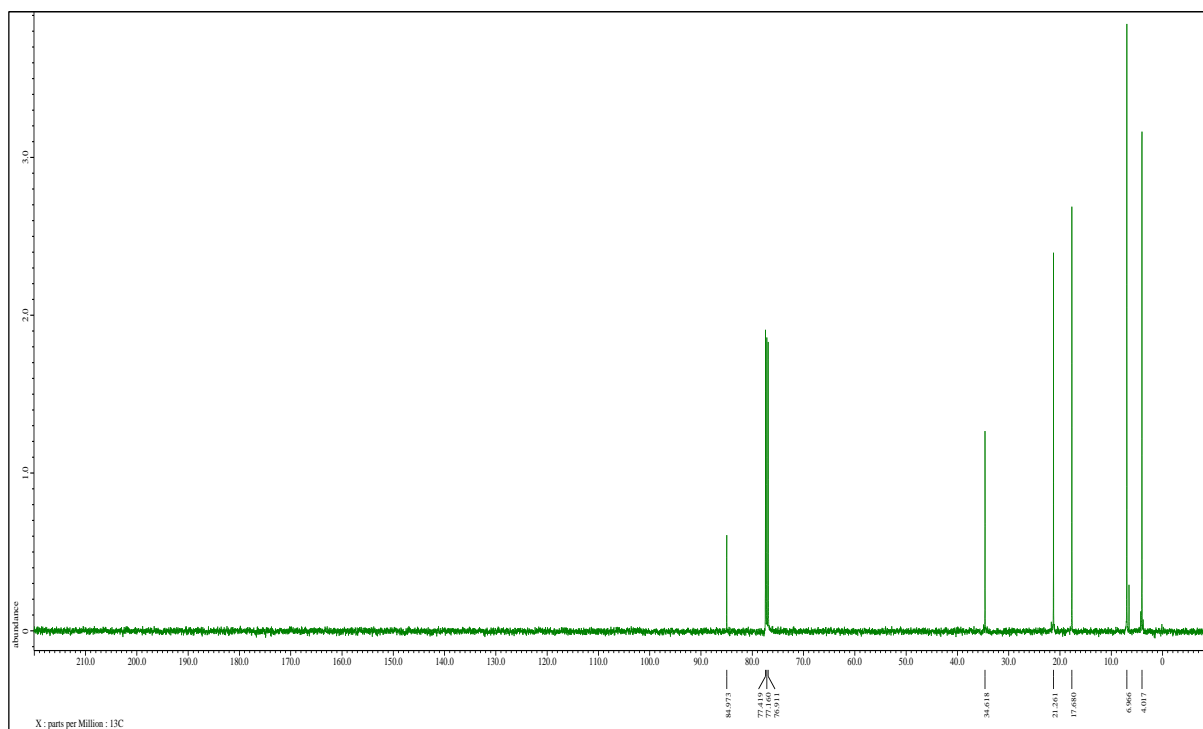

<sup>1</sup>H NMR spectrum of **2j** (500 MHz, CDCl<sub>3</sub>)

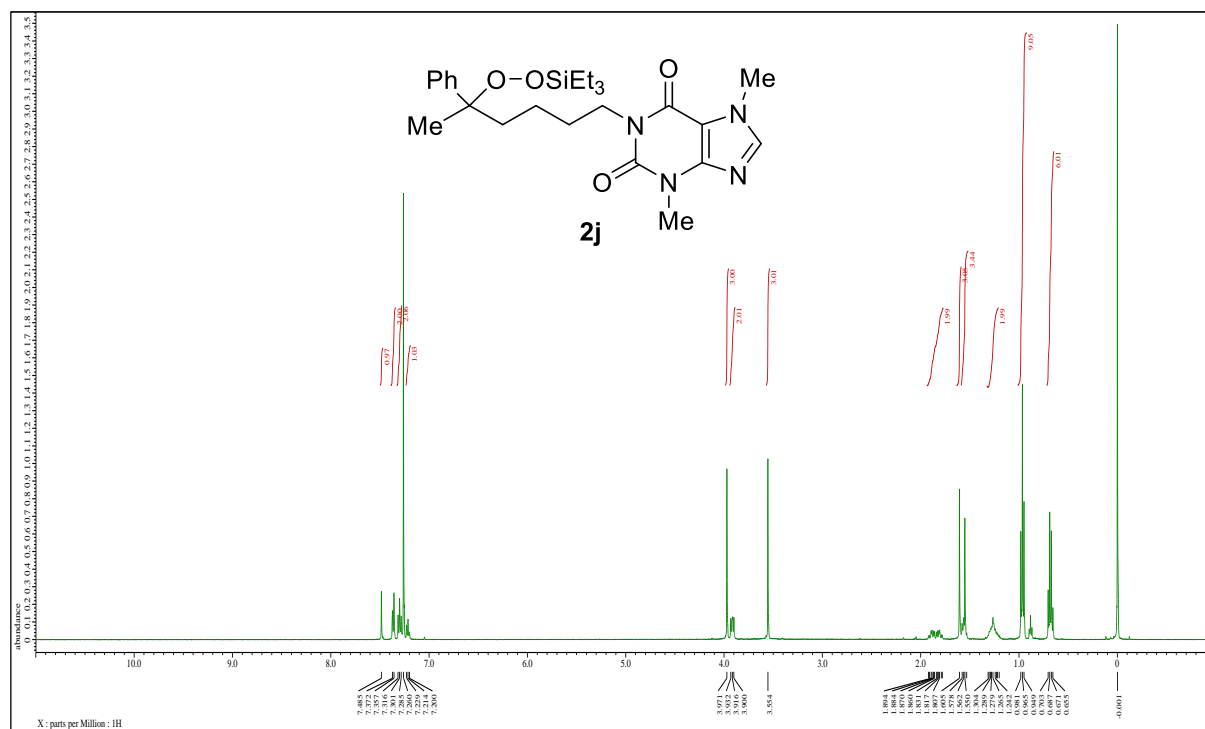

<sup>13</sup>C NMR spectrum of **2j** (125 MHz, CDCl<sub>3</sub>)

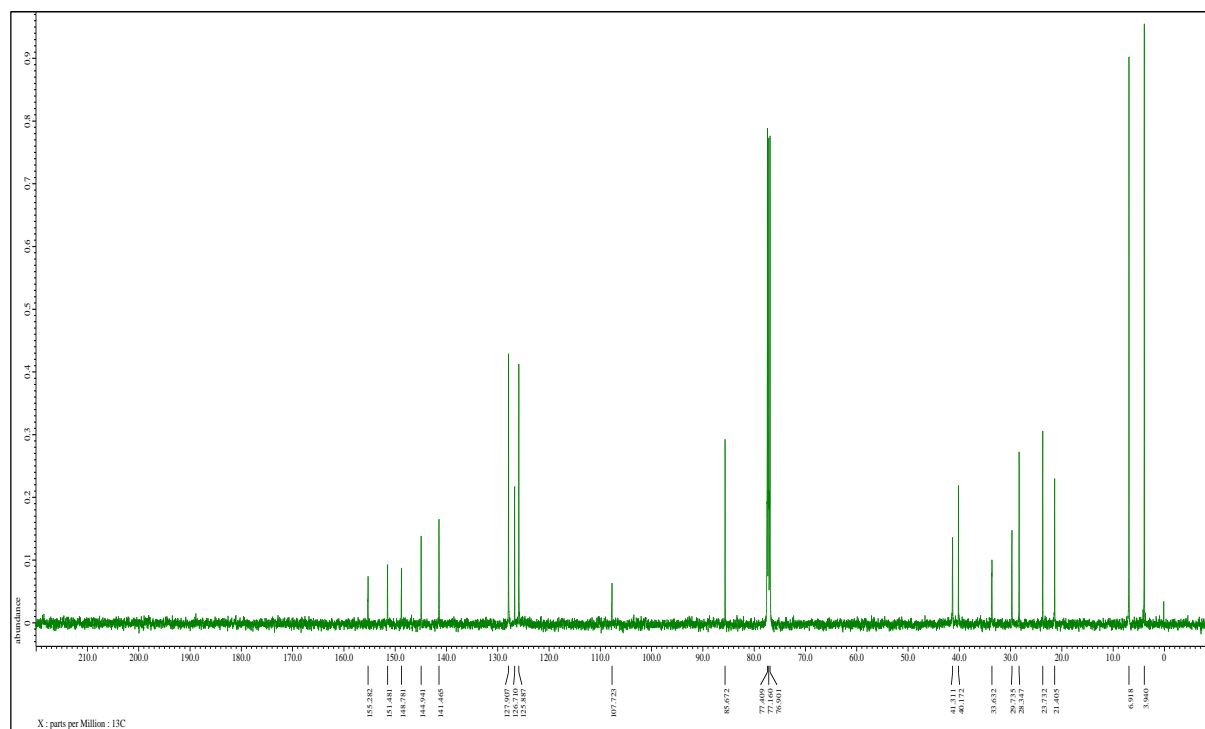

<sup>1</sup>H NMR spectrum of **3a** (500 MHz, CDCl<sub>3</sub>)

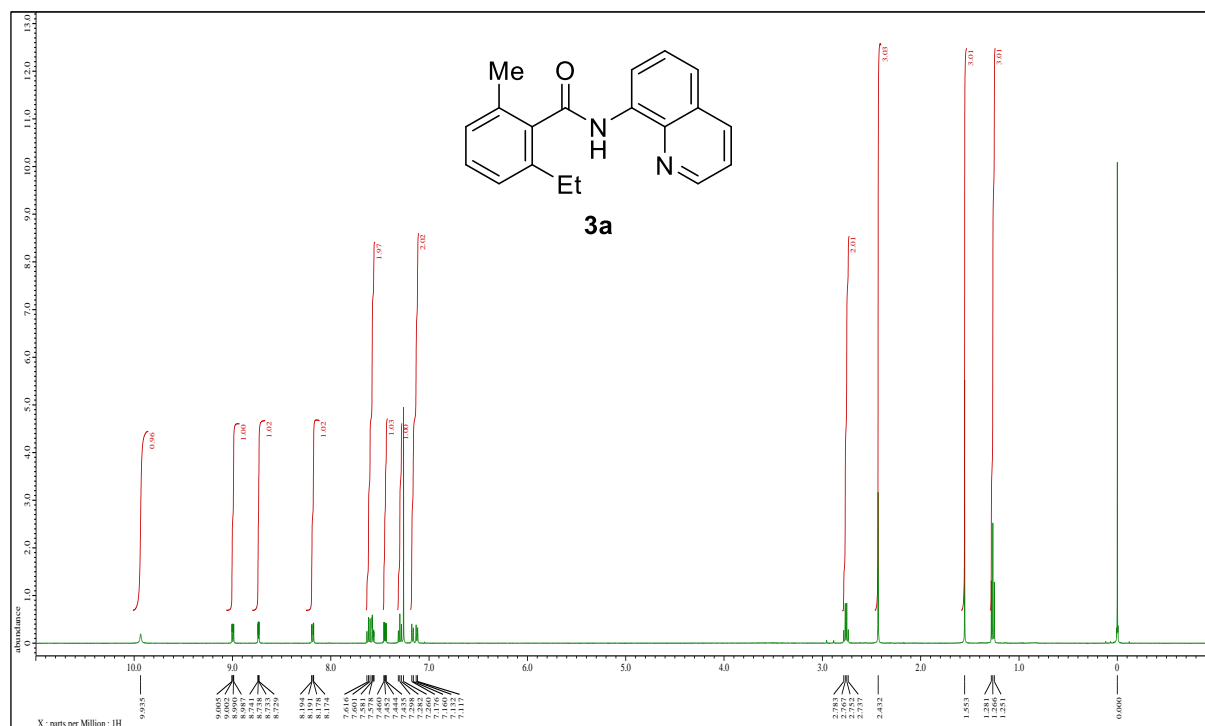

<sup>1</sup>H NMR spectrum of **3b** (500 MHz, CDCl<sub>3</sub>)

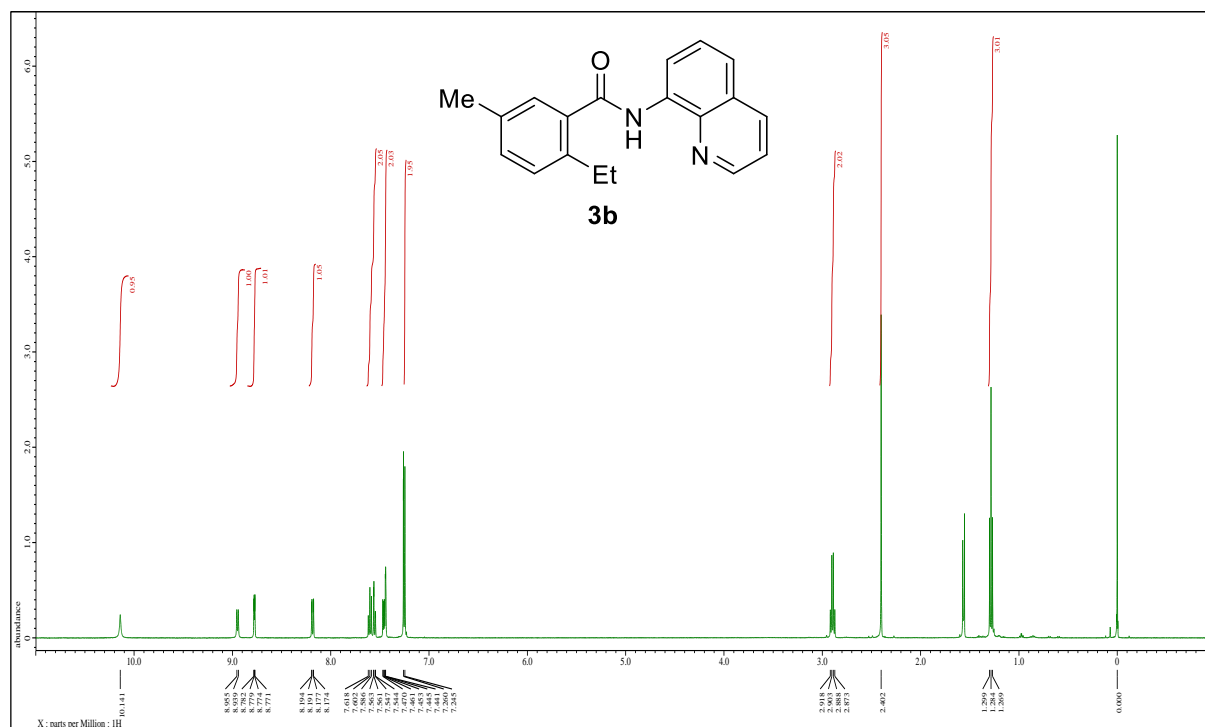



<sup>1</sup>H NMR spectrum of **3c** (500 MHz, CDCl<sub>3</sub>)

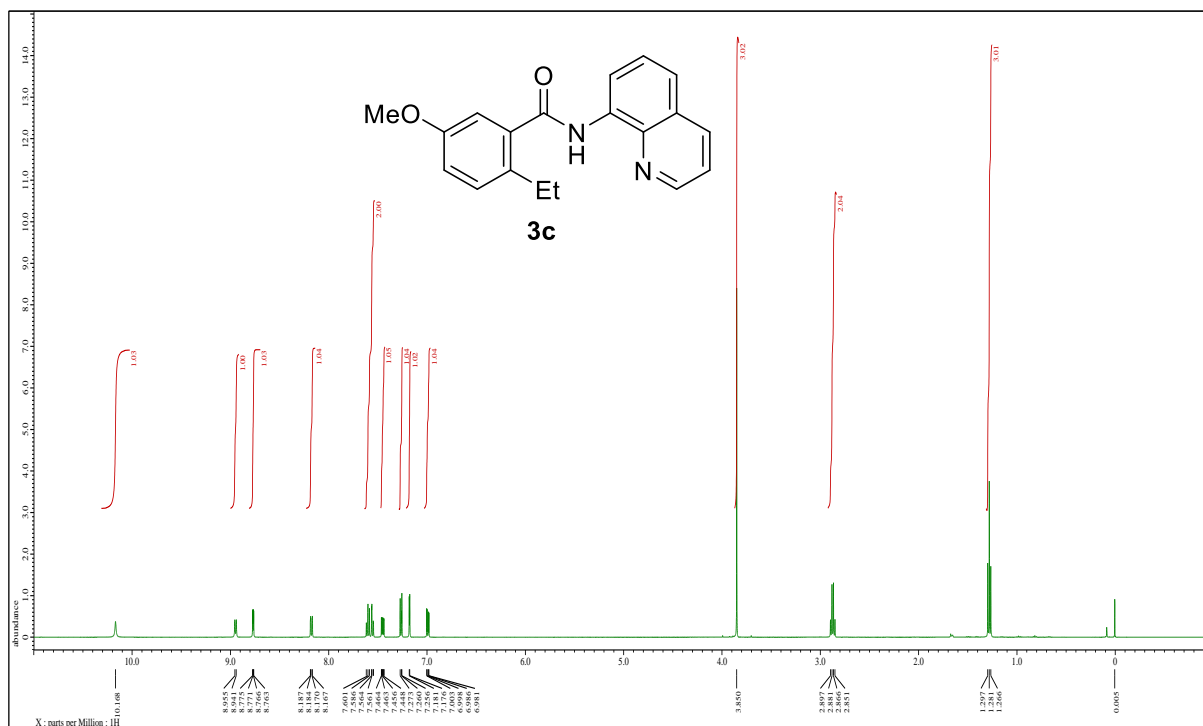

<sup>1</sup>H NMR spectrum of **3d** (500 MHz, CDCl<sub>3</sub>)

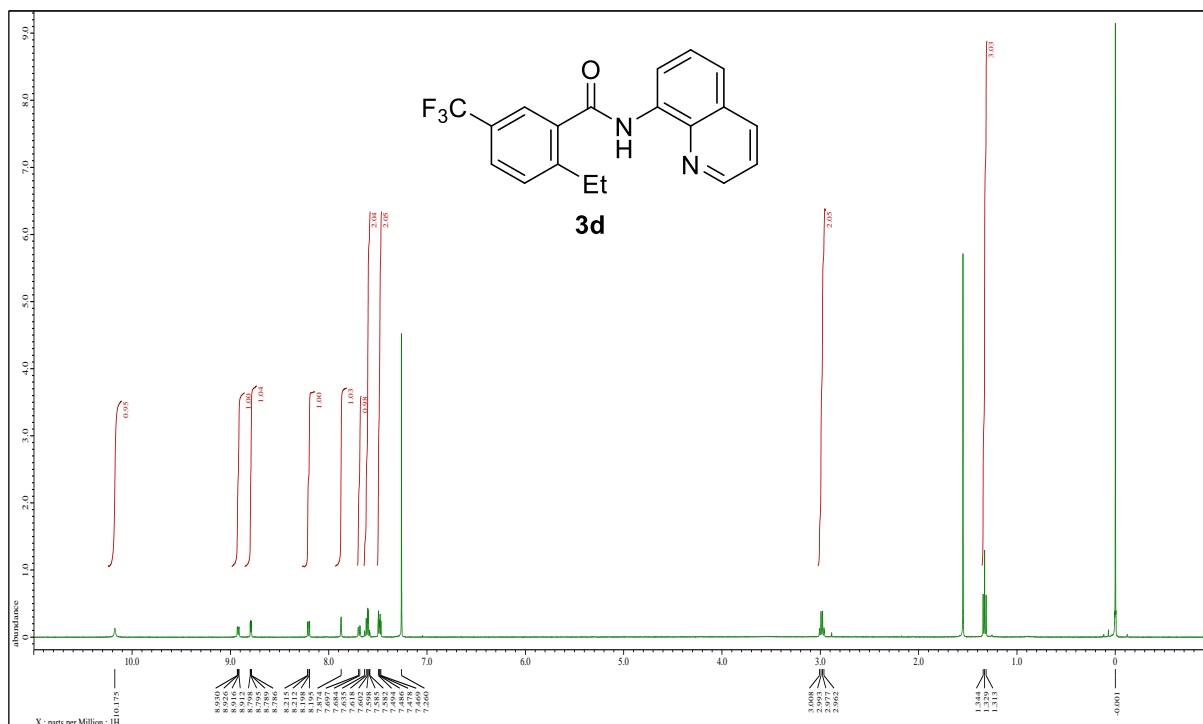

<sup>1</sup>H NMR spectrum of **3e** (500 MHz, CDCl<sub>3</sub>)

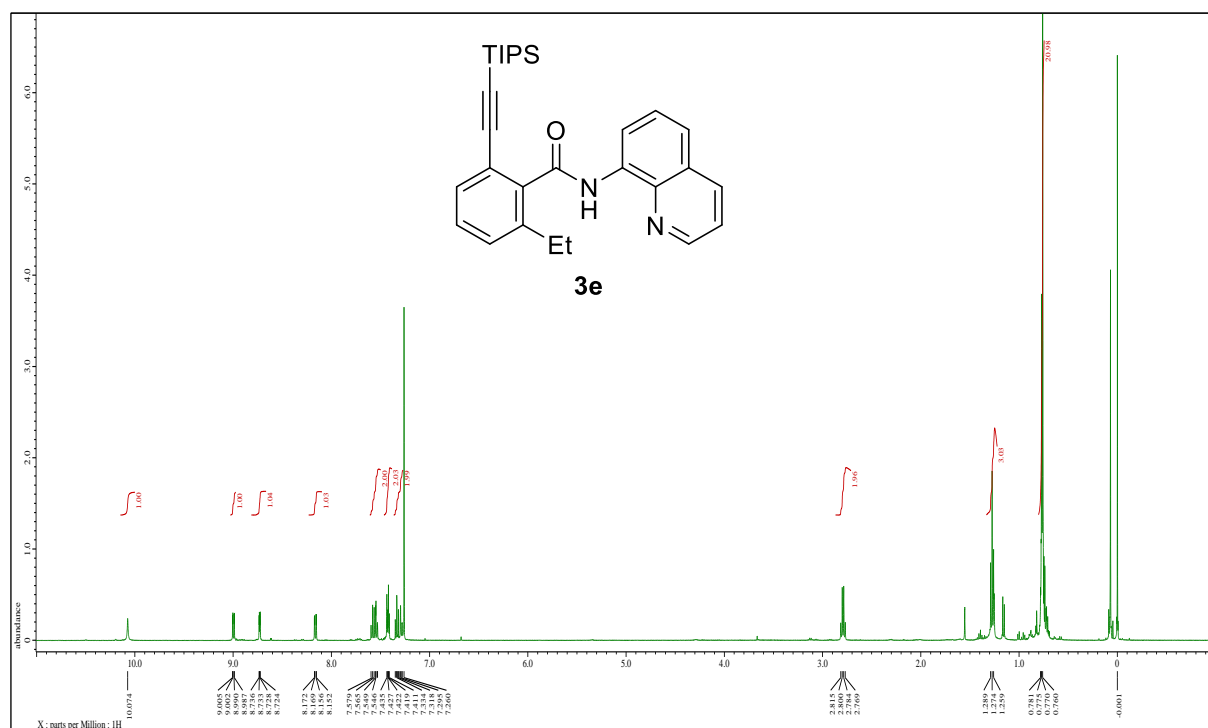

<sup>1</sup>H NMR spectrum of **3f** (500 MHz, CDCl<sub>3</sub>)

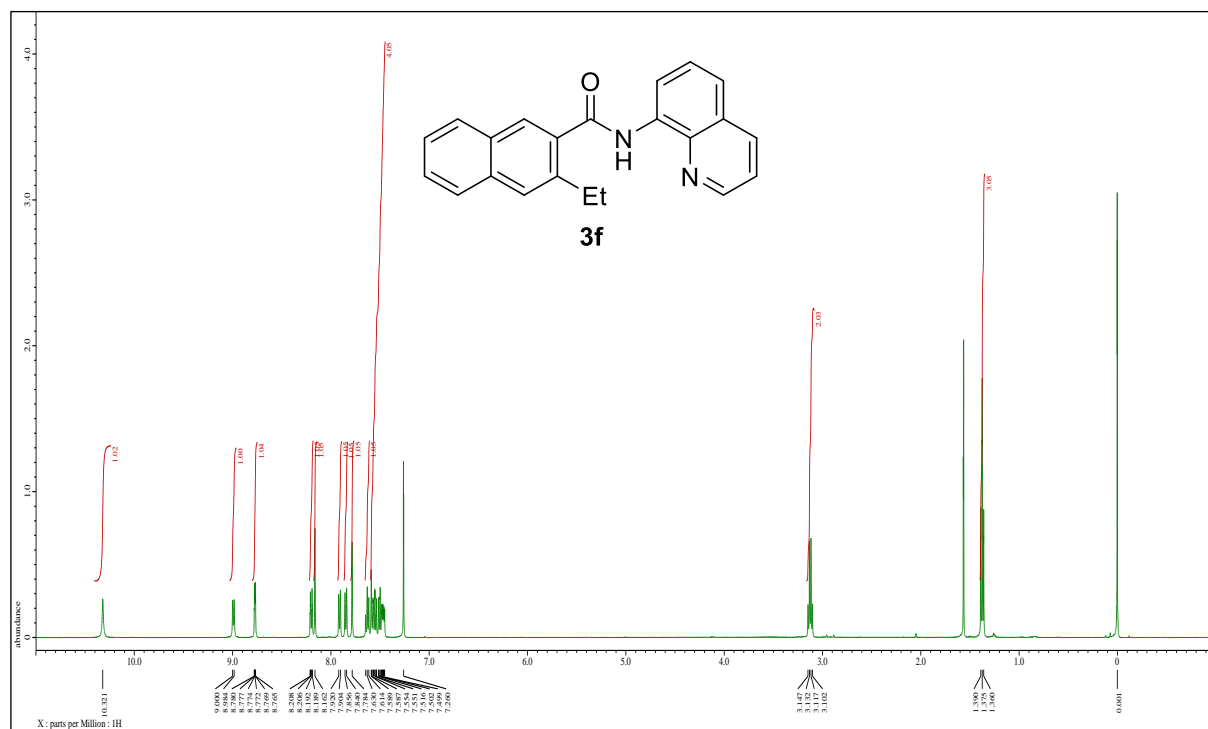

$^1\text{H}$  NMR spectrum of **3g** (500 MHz,  $\text{CDCl}_3$ )

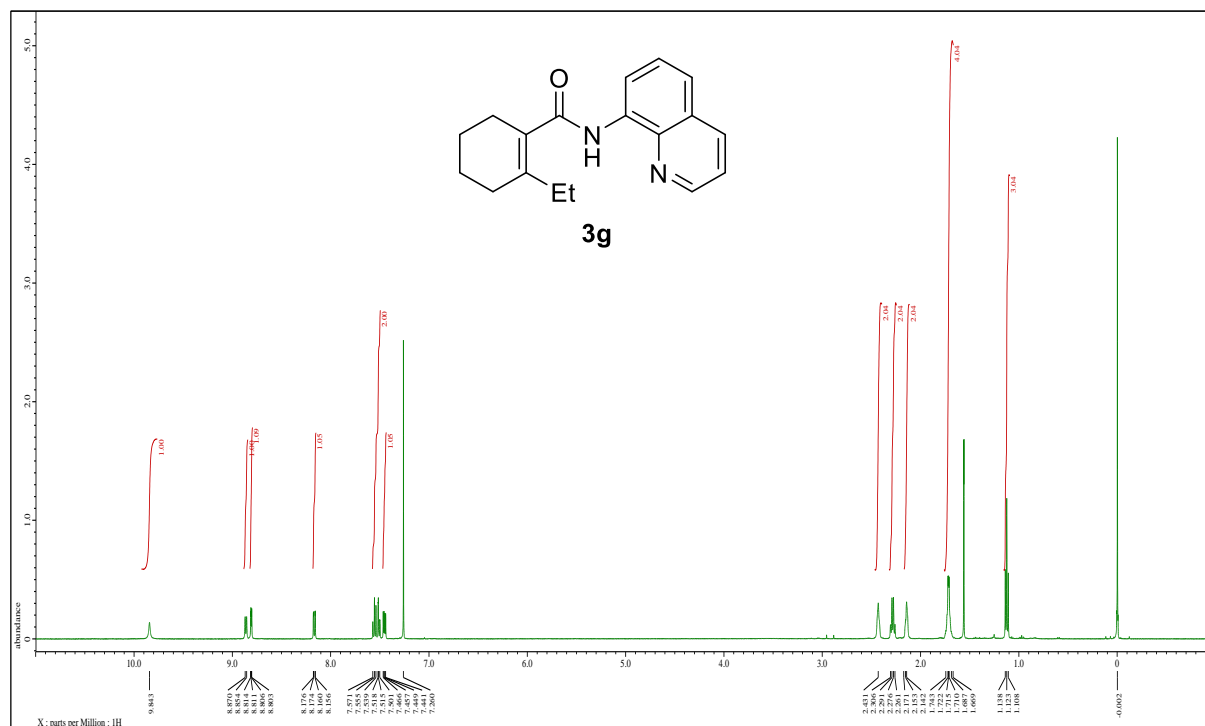

<sup>1</sup>H NMR spectrum of **3h** (500 MHz, CDCl<sub>3</sub>)

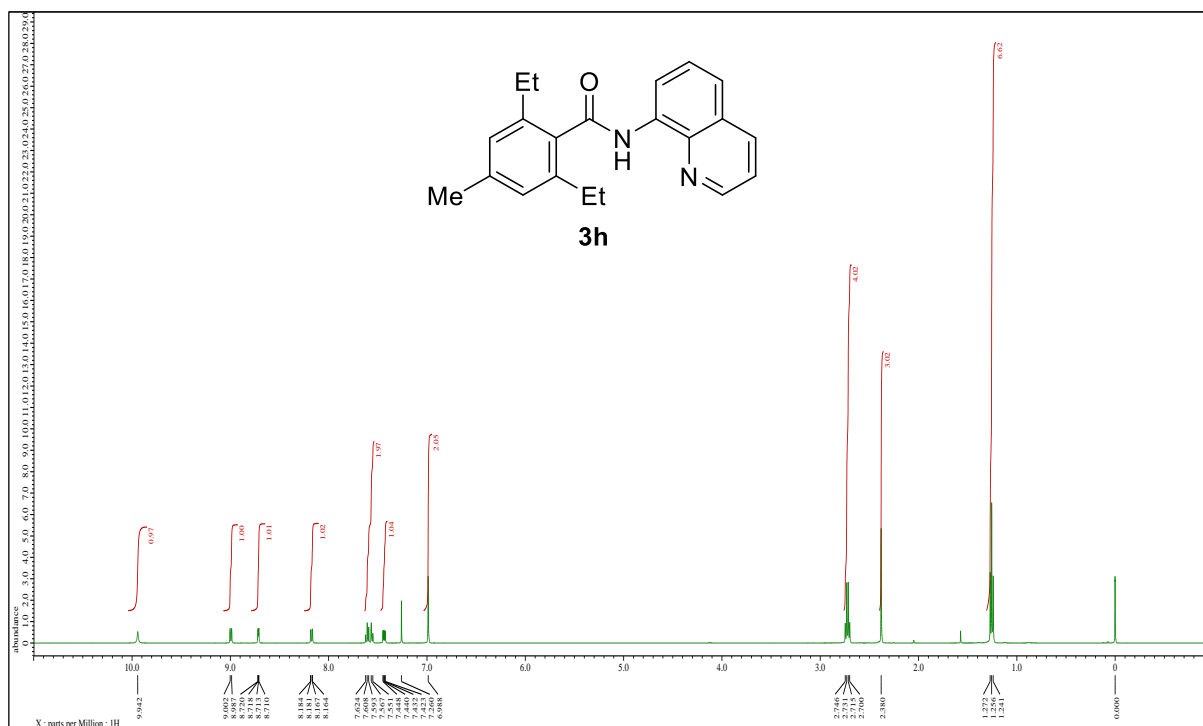

<sup>13</sup>C NMR spectrum of **3h** (125 MHz, CDCl<sub>3</sub>)

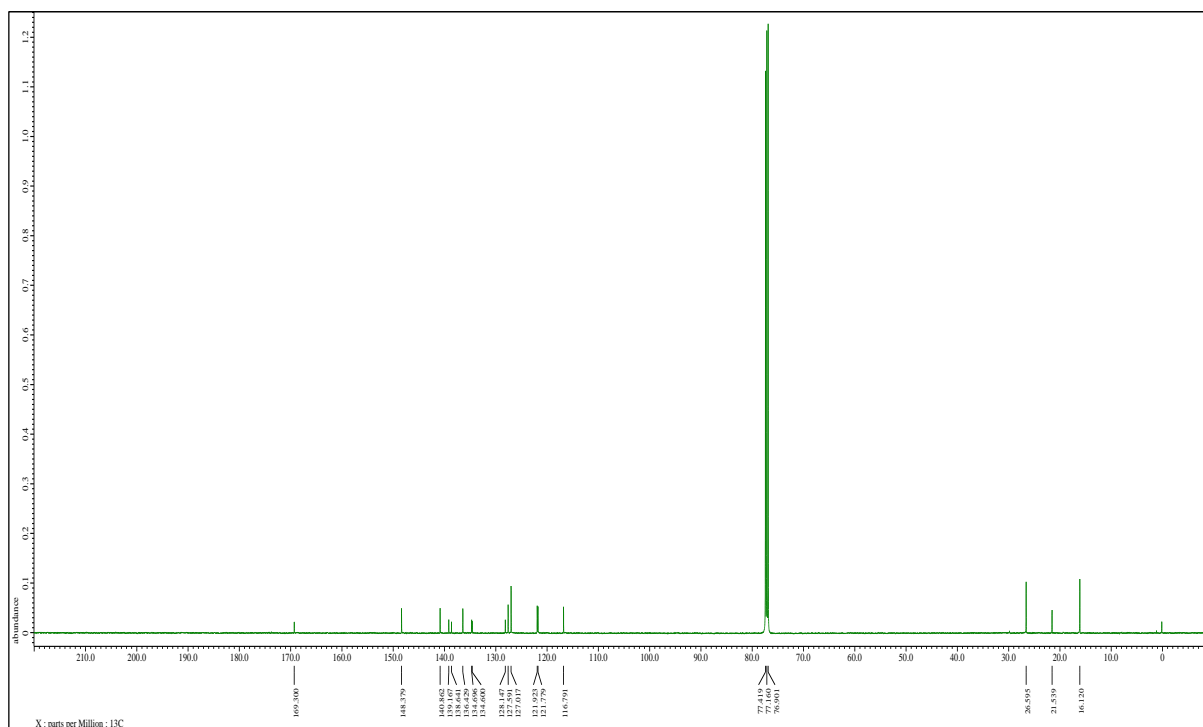

$^1\text{H}$  NMR spectrum of **3h'** (500 MHz,  $\text{CDCl}_3$ )

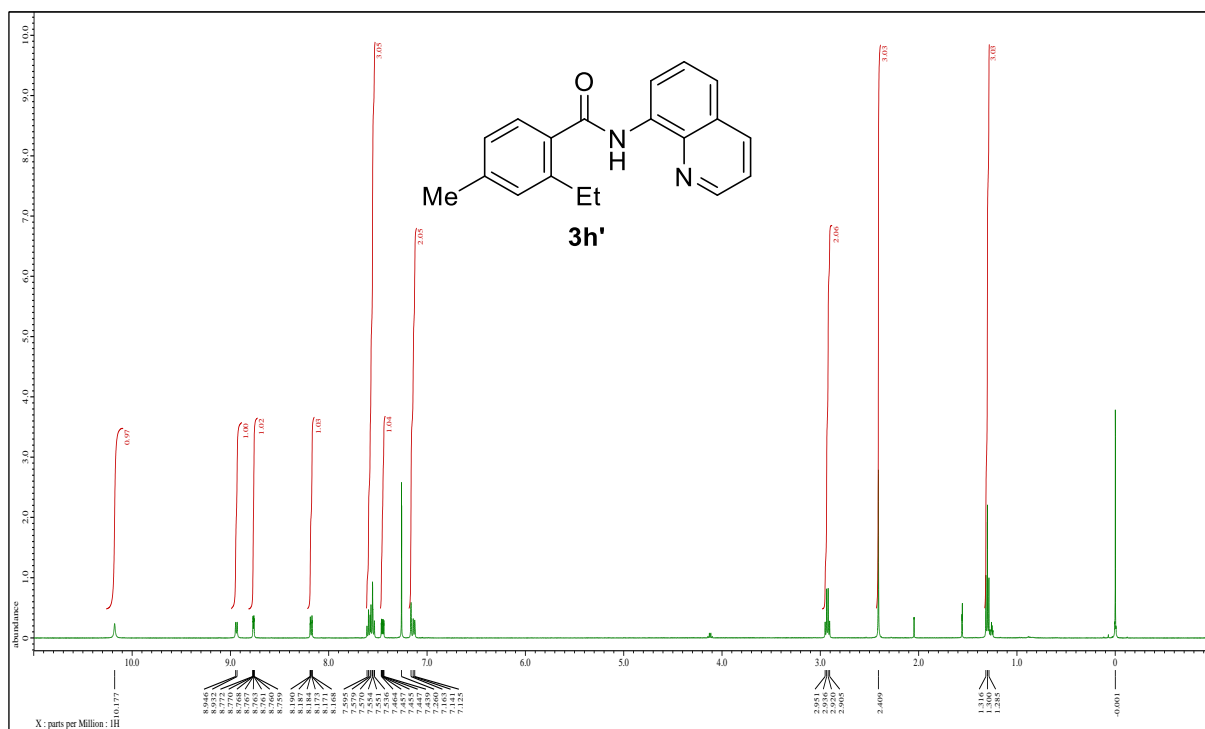

<sup>1</sup>H NMR spectrum of **3i** (500 MHz, CDCl<sub>3</sub>)

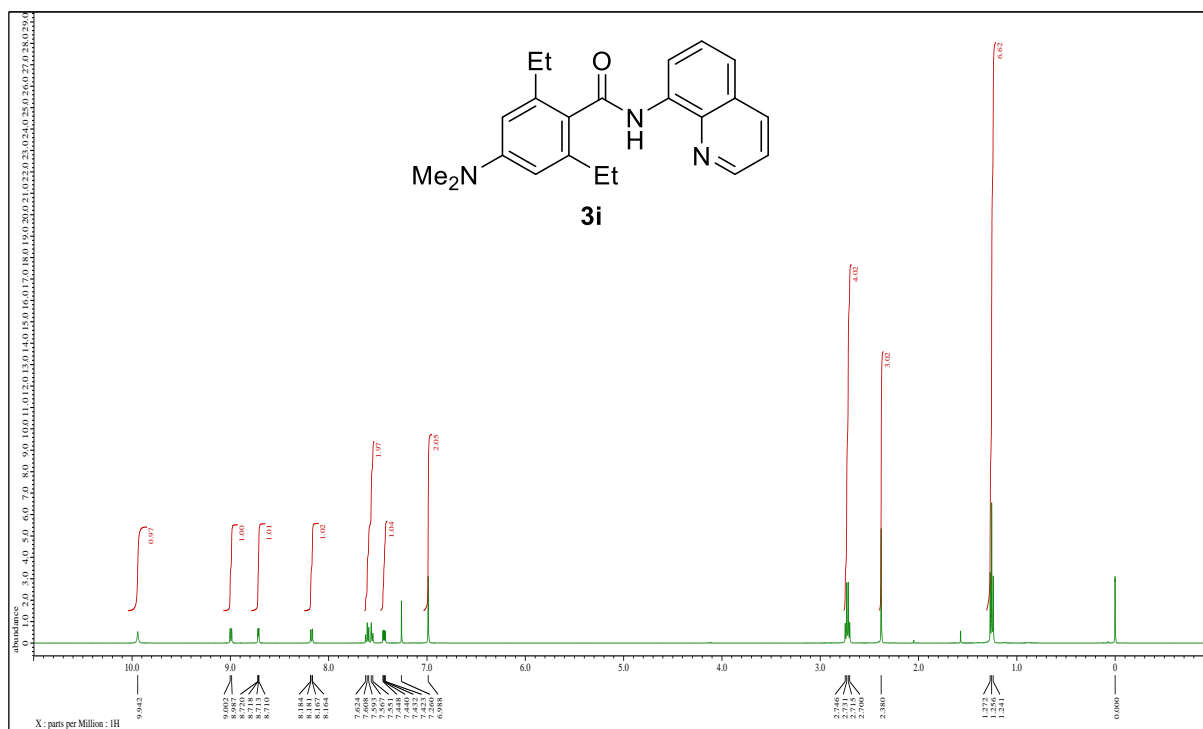

<sup>13</sup>C NMR spectrum of **3i** (125 MHz, CDCl<sub>3</sub>)

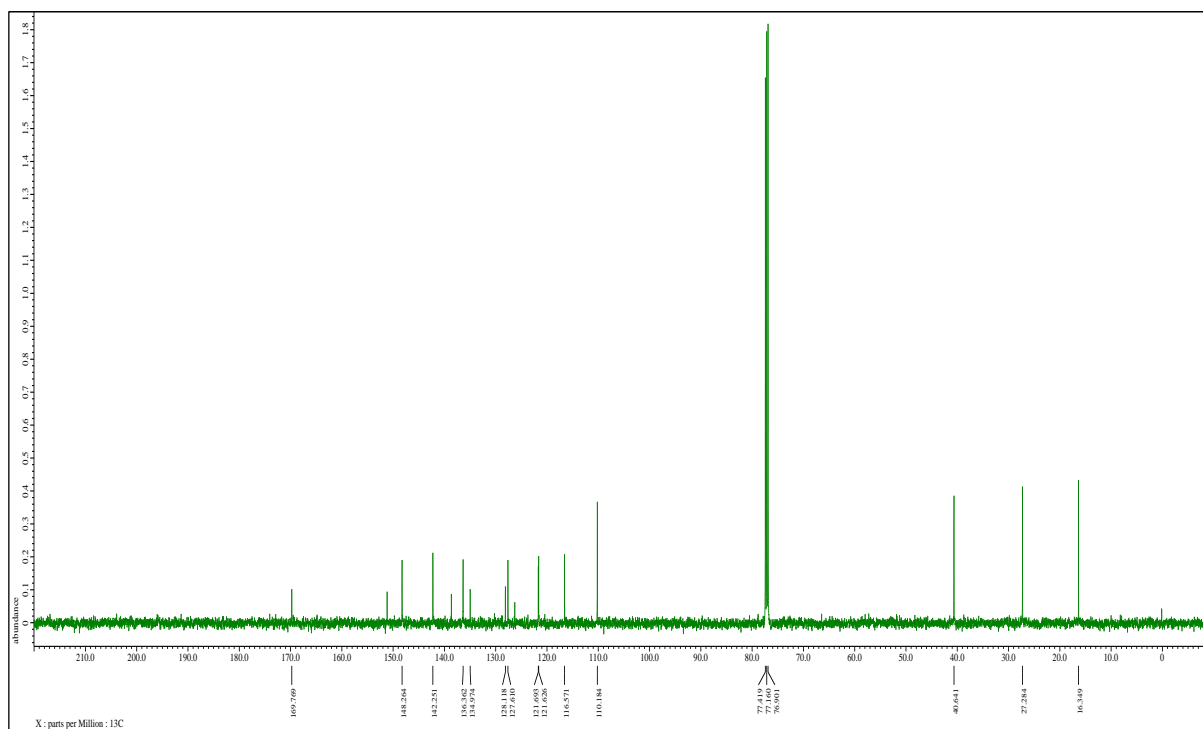

$^1\text{H}$  NMR spectrum of **3i'** (500 MHz,  $\text{CDCl}_3$ )

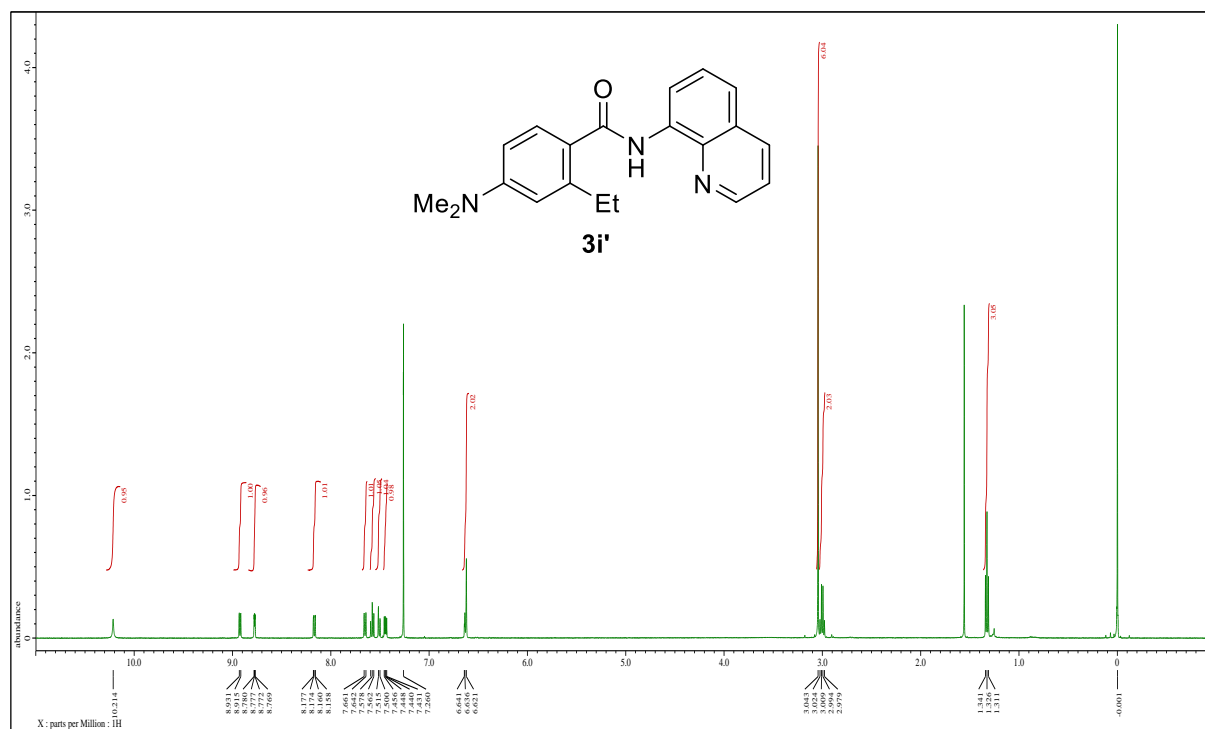

$^1\text{H}$  NMR spectrum of **3j** and **3j'** (500 MHz,  $\text{CDCl}_3$ ) (**3j** / **3j'** = 1.0 / 0.96)

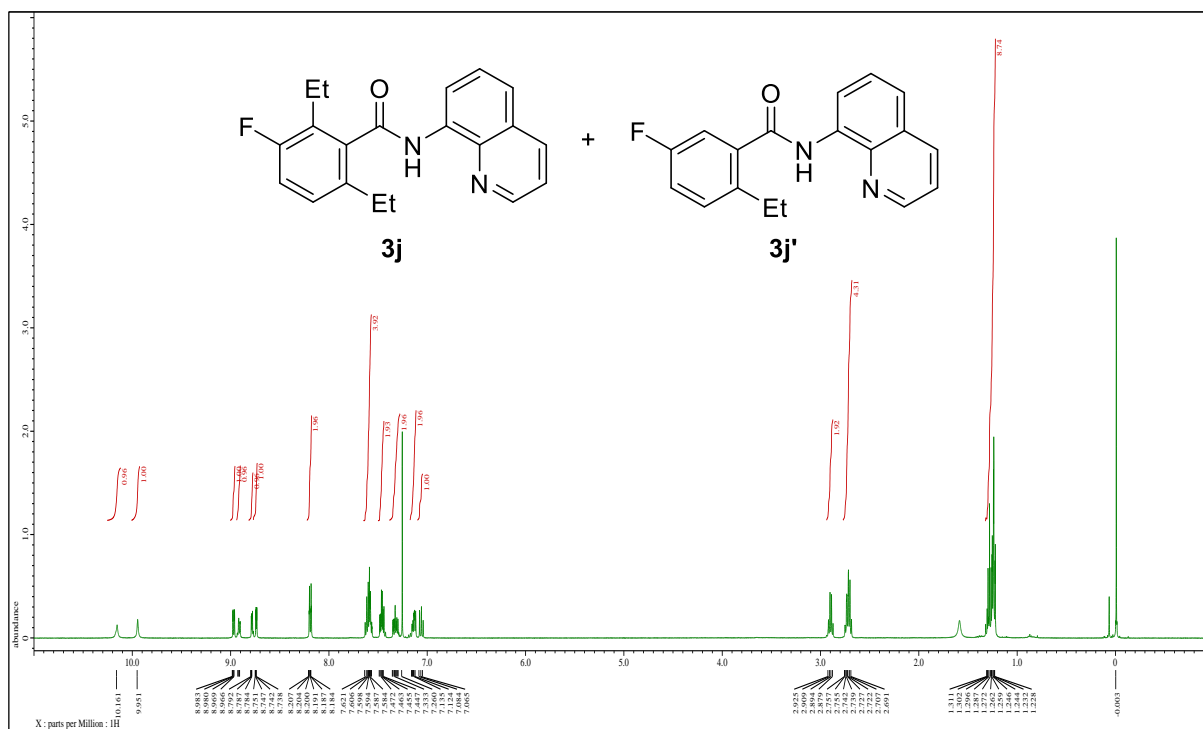

$^{13}\text{C}$  NMR spectrum of **3j** and **3j'** (125 MHz,  $\text{CDCl}_3$ )

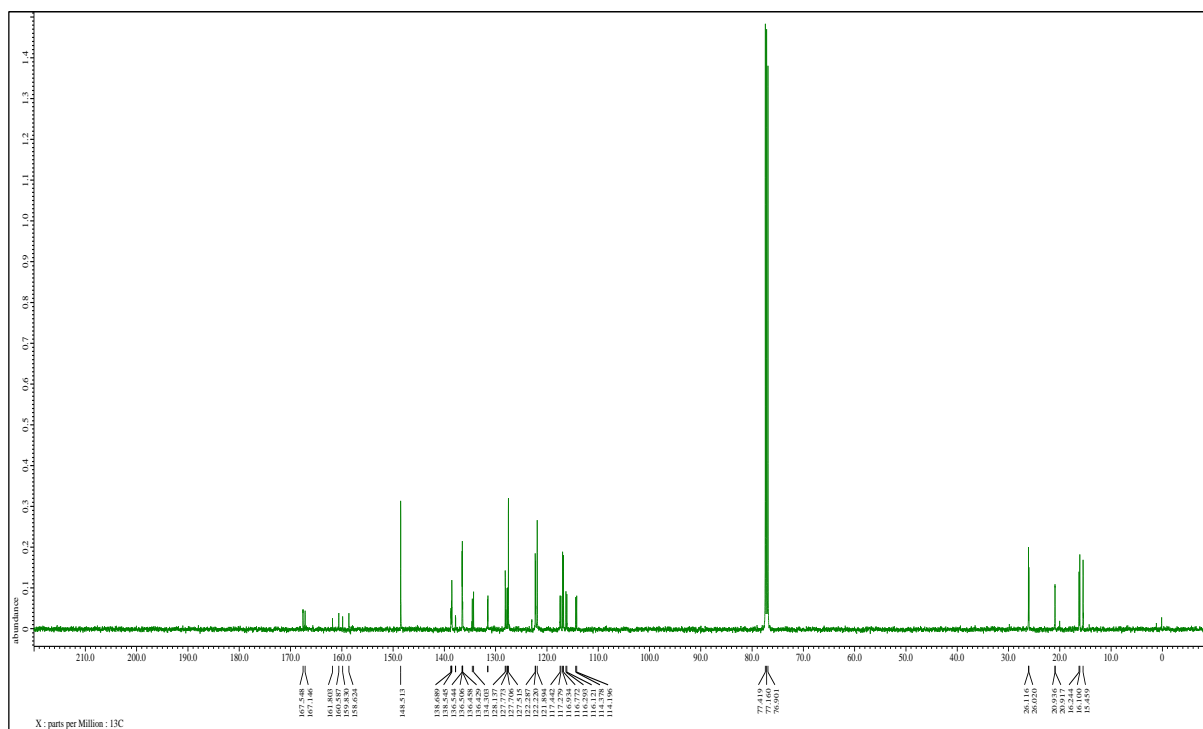



$^1\text{H}$  NMR spectrum of **3k** (500 MHz,  $\text{CDCl}_3$ )

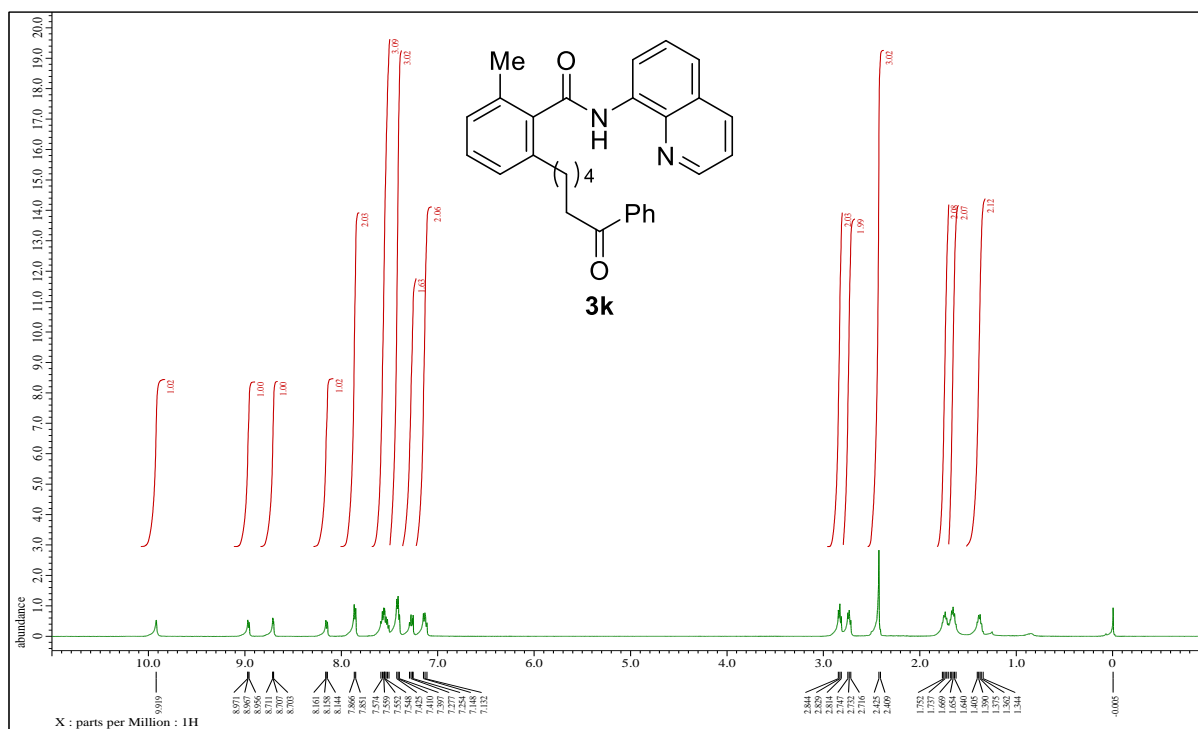

$^{13}\text{C}$  NMR spectrum of **3k** (125 MHz,  $\text{CDCl}_3$ )

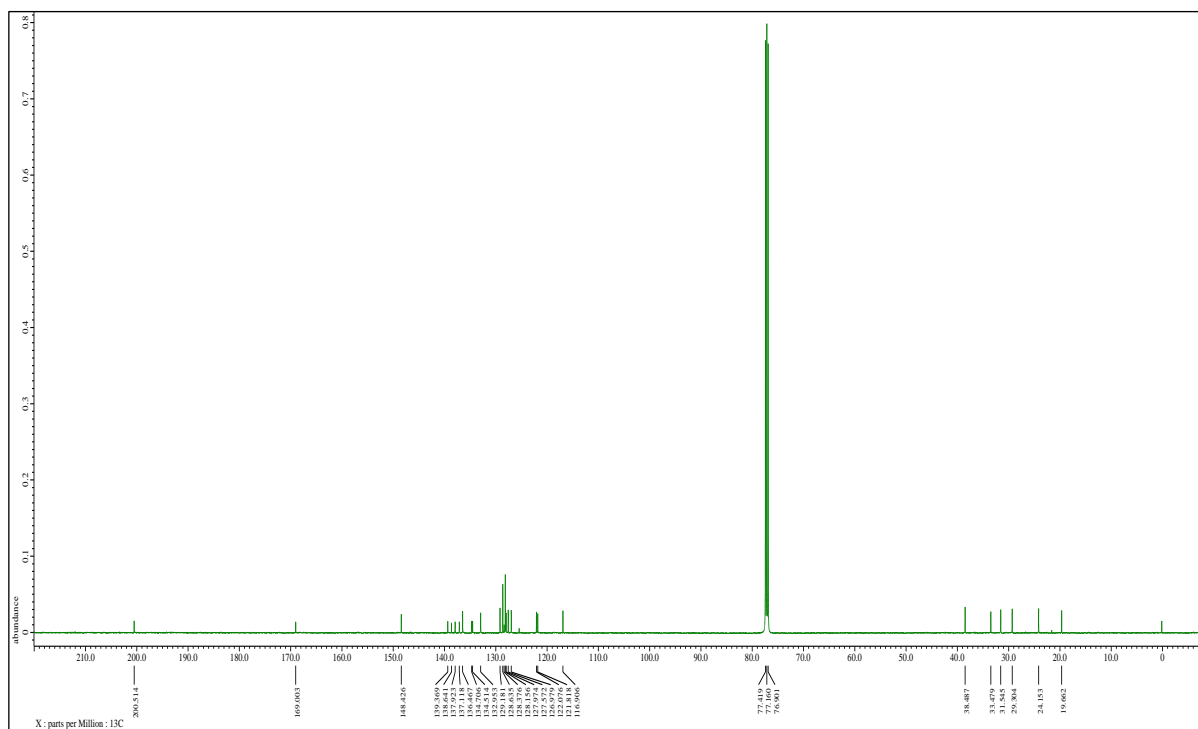

<sup>1</sup>H NMR spectrum of **31** (500 MHz, CDCl<sub>3</sub>)

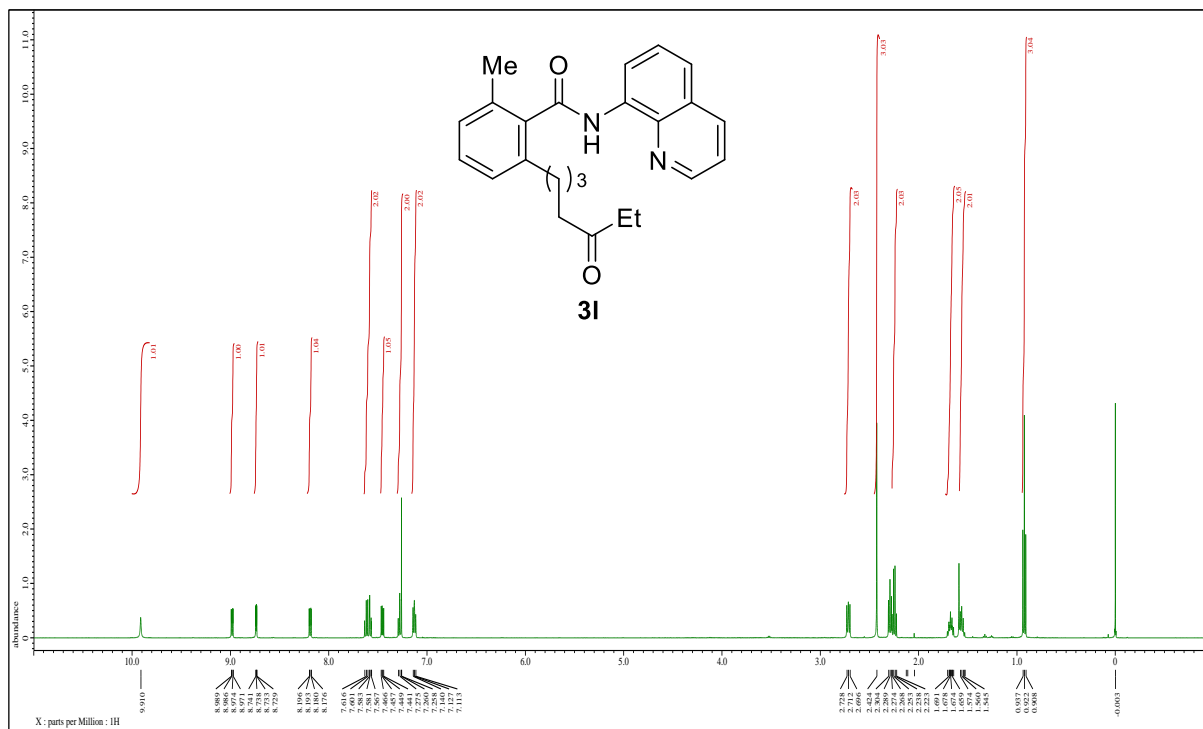

<sup>13</sup>C NMR spectrum of **31** (125 MHz, CDCl<sub>3</sub>)

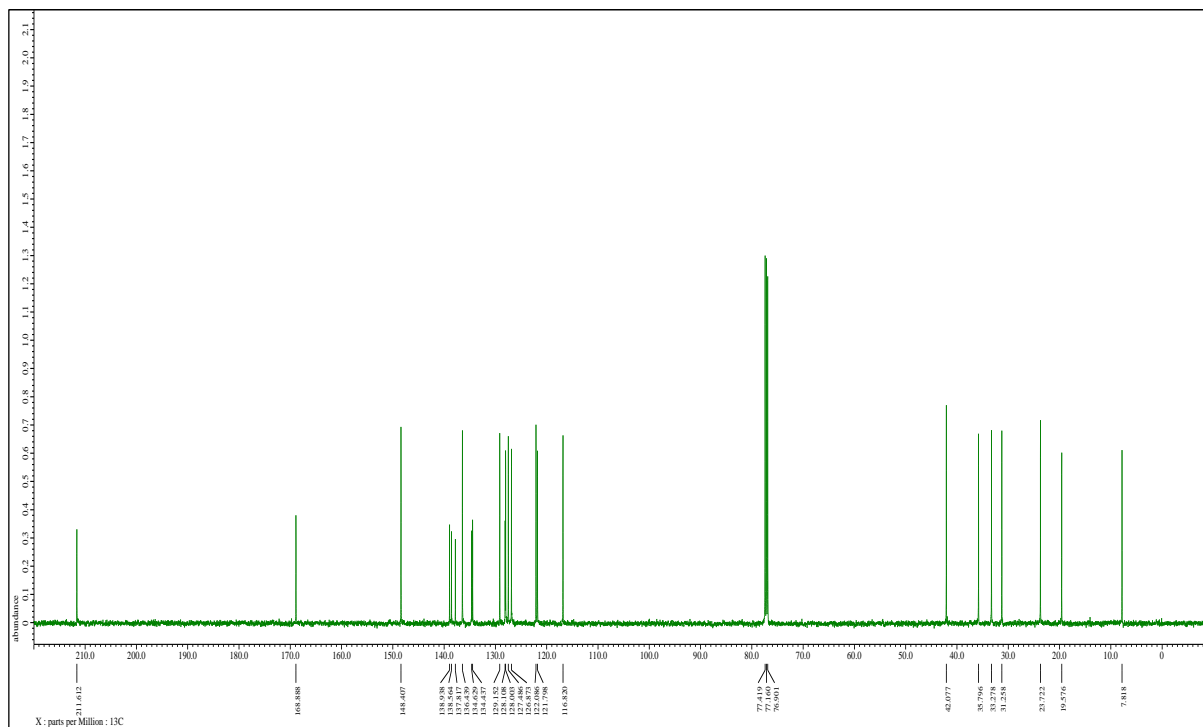

<sup>1</sup>H NMR spectrum of **3m** (500 MHz, CDCl<sub>3</sub>)

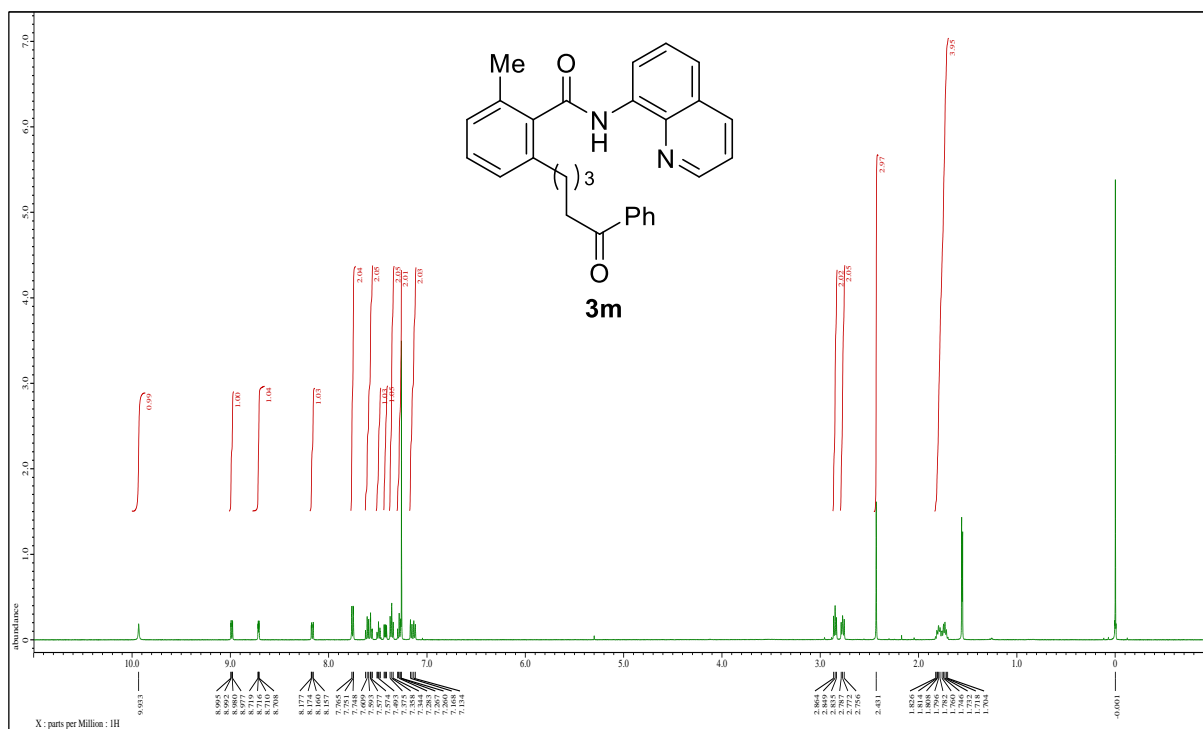

<sup>13</sup>C NMR spectrum of **3m** (125 MHz, CDCl<sub>3</sub>)

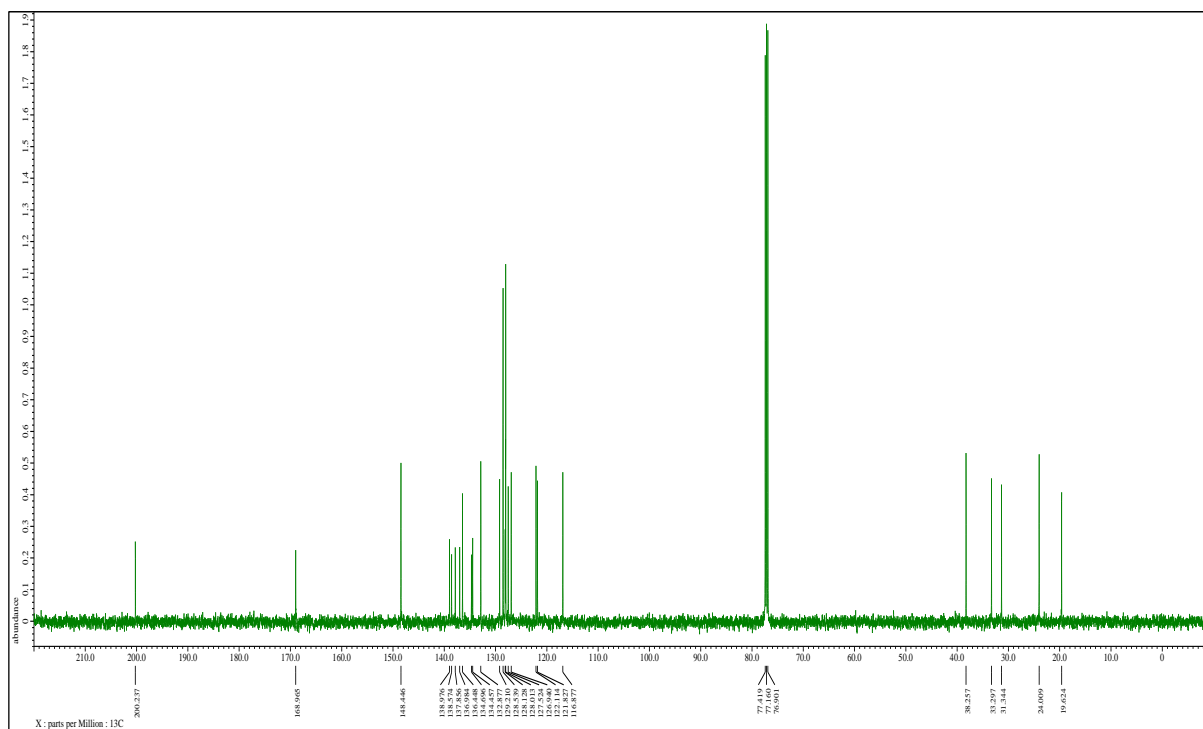

<sup>1</sup>H NMR spectrum of **3n** (500 MHz, CDCl<sub>3</sub>)

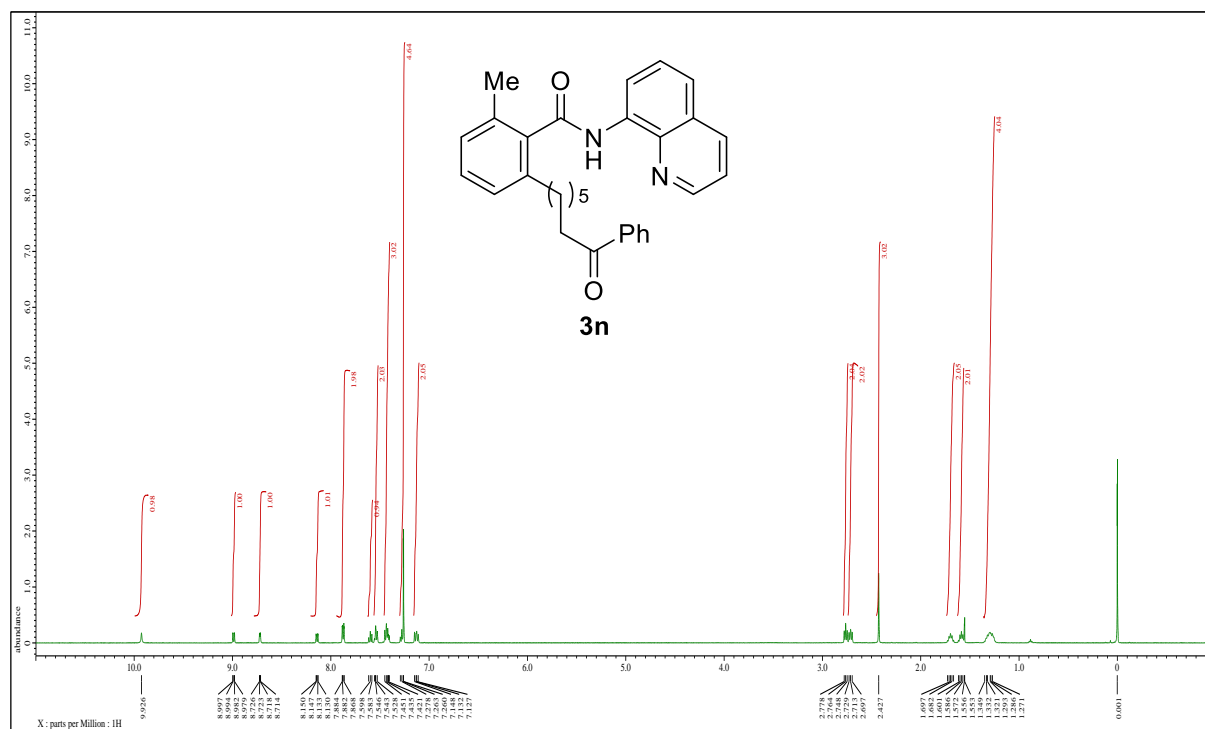

<sup>13</sup>C NMR spectrum of **3n** (125 MHz, CDCl<sub>3</sub>)

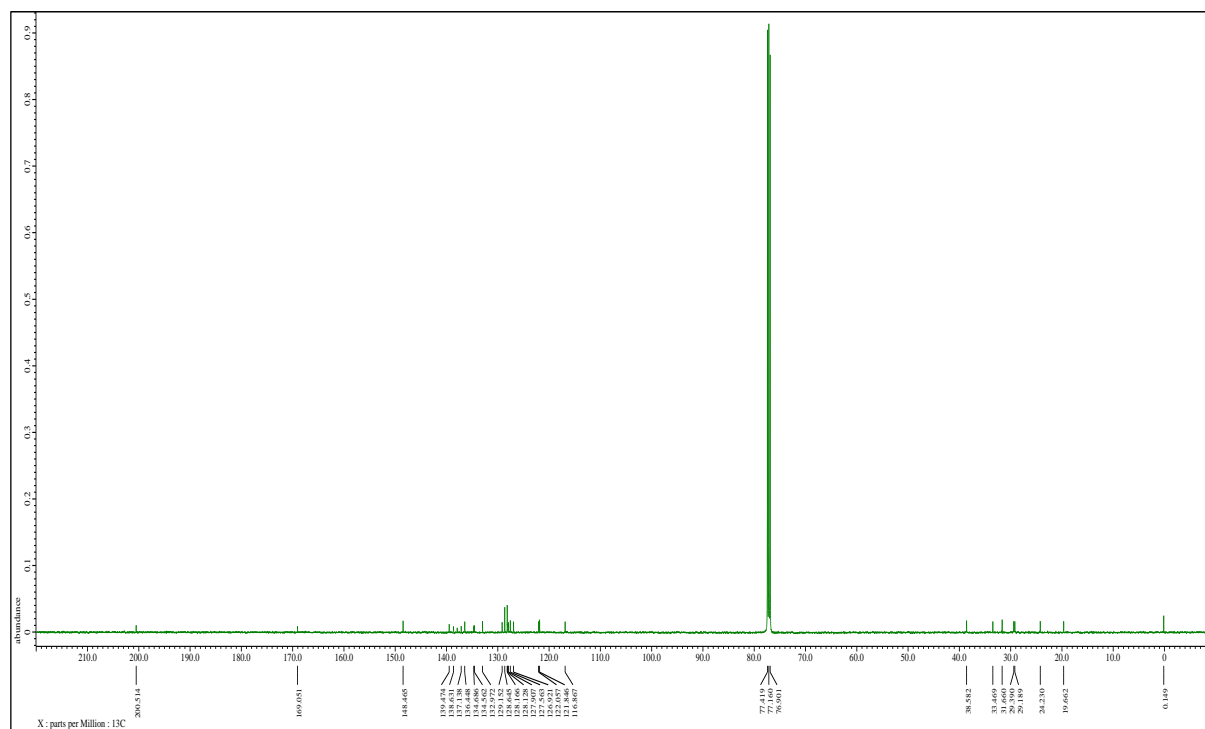

$^1\text{H}$  NMR spectrum of **3o** (500 MHz,  $\text{CDCl}_3$ )

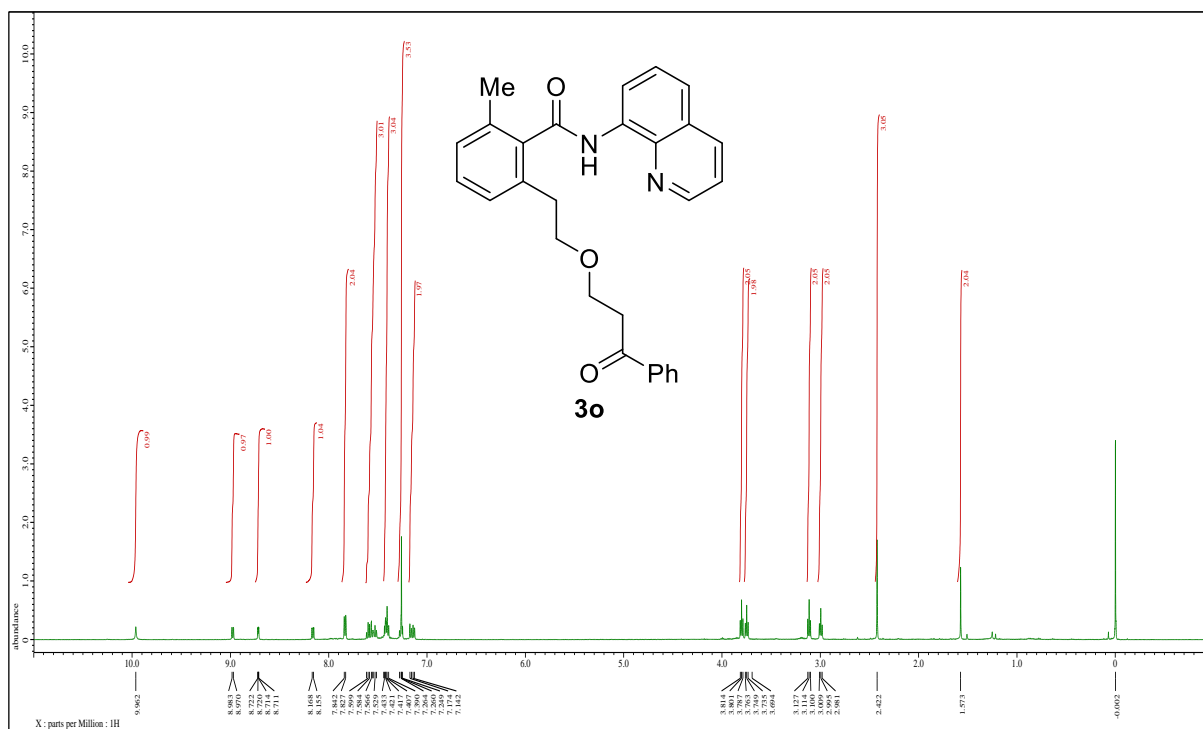

$^{13}\text{C}$  NMR spectrum of **3o** (125 MHz,  $\text{CDCl}_3$ )

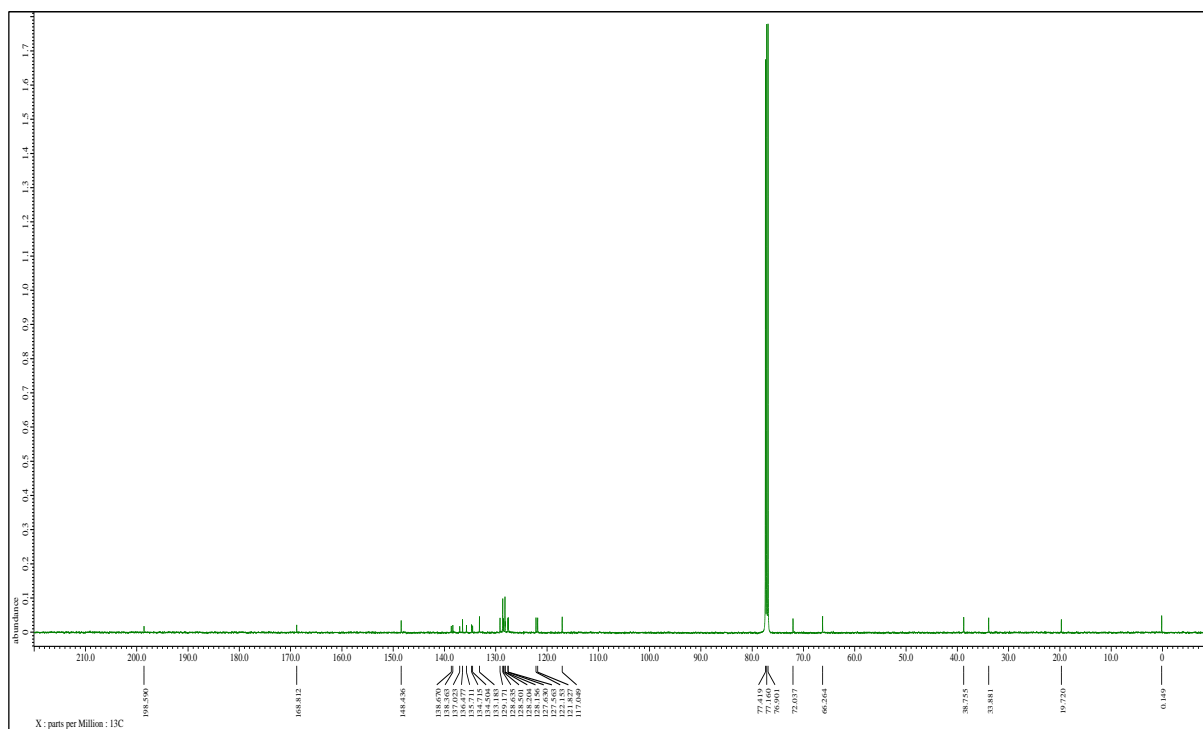

$^1\text{H}$  NMR spectrum of **3p** (500 MHz,  $\text{CDCl}_3$ )

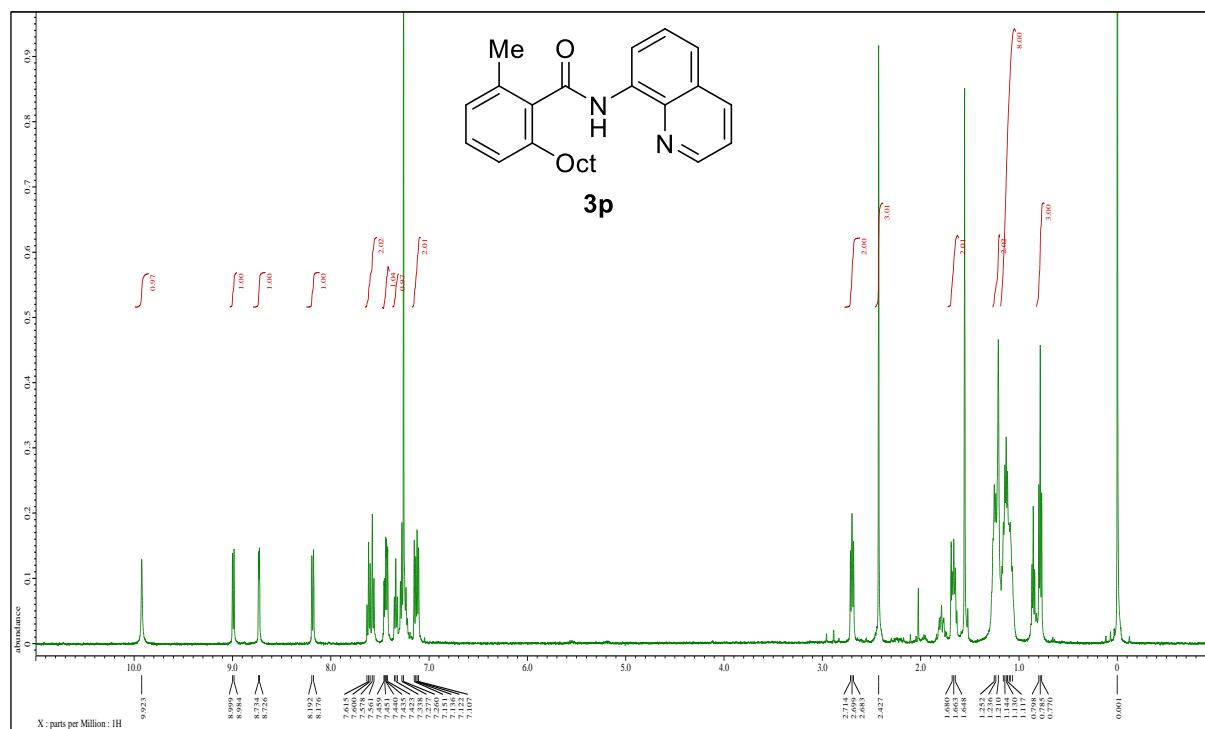

$^1\text{H}$  NMR spectrum of **3q** (500 MHz,  $\text{CDCl}_3$ )

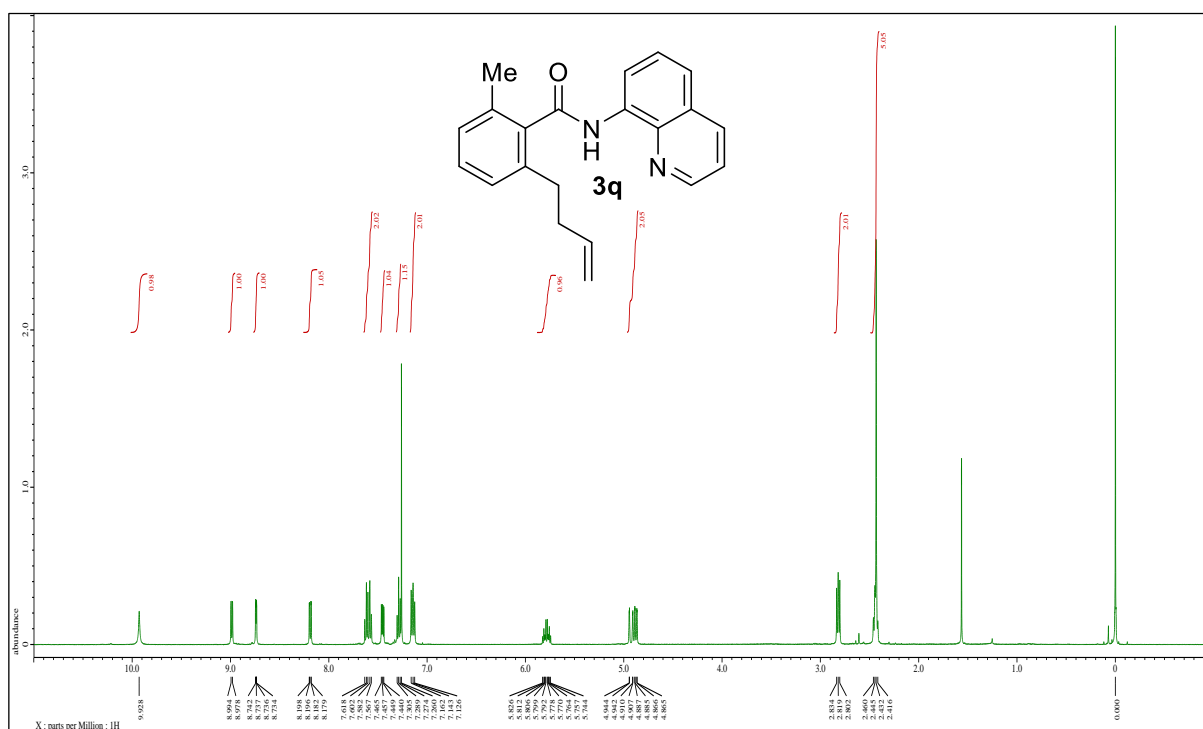

<sup>1</sup>H NMR spectrum of **3s** (500 MHz, CDCl<sub>3</sub>)

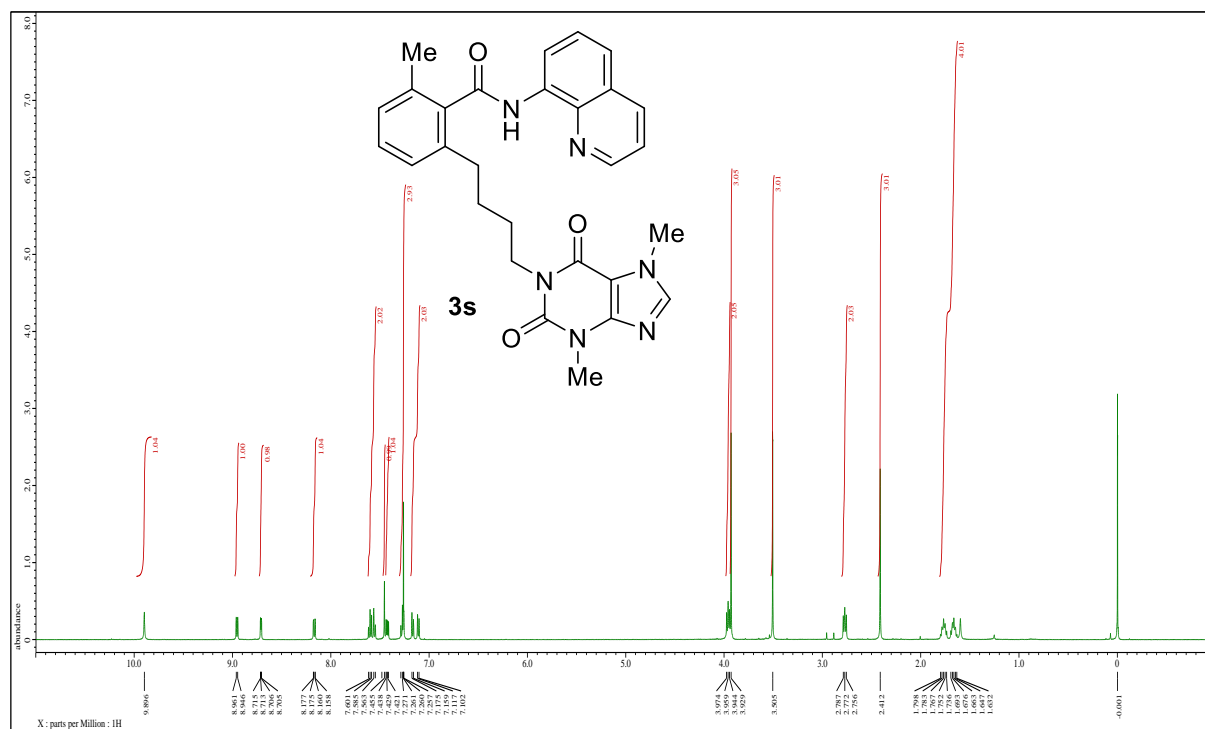

<sup>13</sup>C NMR spectrum of **3s** (125 MHz, CDCl<sub>3</sub>)

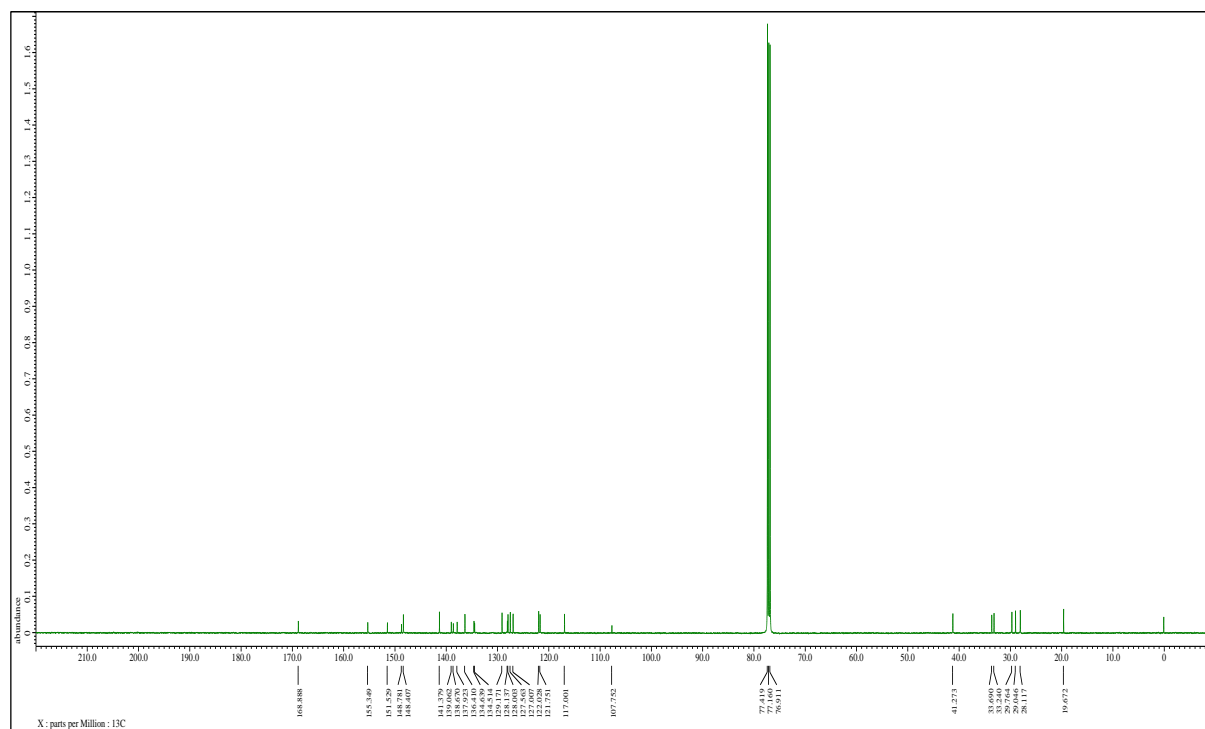

Supplement: d1cc02983e1.pdf [file d1cc02983e1.pdf]
